# Robust and fast Monte Carlo Markov Chain sampling of diffusion MRI microstructure models

R.L. Harms<sup>a</sup>, A. Roebroek<sup>a</sup>

<sup>a</sup>*Dept. of Cognitive Neuroscience, Faculty of Psychology & Neuroscience, Maastricht University, the Netherlands*

---

## Abstract

In diffusion MRI analysis, advances in biophysical multi-compartment modeling have gained popularity over the conventional Diffusion Tensor Imaging (DTI), because they possess greater specificity in relating the dMRI signal to underlying cellular microstructure. Biophysical multi-compartment models require parameter estimation, typically performed using either Maximum Likelihood Estimation (MLE) or using Monte Carlo Markov Chain (MCMC) sampling. Whereas MLE provides only a point estimate of the fitted model parameters, MCMC recovers the entire posterior distribution of the model parameters given the data, providing additional information such as parameter uncertainty and correlations. MCMC sampling is currently not routinely applied in dMRI microstructure modeling because it requires adjustments and tuning specific to each model, particularly in the choice of proposal distributions, burn-in length, thinning and the number of samples to store. In addition, sampling often takes at least an order of magnitude more time than non-linear optimization. Here we investigate the performance of MCMC algorithm variations over multiple popular diffusion microstructure models to see whether a single well performing variation could be applied efficiently and robustly to many models. Using an efficient GPU-based implementation, we show that run times can be removed as a prohibitive constraint for sampling of diffusion multi-compartment models. Using this implementation, we investigated the effectiveness of different adaptive MCMC algorithms, burn-in, initialization and thinning. Finally we apply the theory of Effective Sample Size to diffusion multi-compartment models as a way of determining a relatively general target for the number of samples needed to characterize parameter distributions for different models and datasets. We conclude that robust and fast sampling is achieved in most diffusion microstructure

models with the Adaptive Metropolis-Within-Gibbs (AMWG) algorithm initialized with an MLE point estimate, in which case 100 to 200 samples are sufficient as a burn-in and thinning is mostly unnecessary. As a relatively general target for the number of samples, we recommend a multi-variate Effective Sample Size of 2200.

*Keywords:* Monte Carlo Markov Chain (MCMC) sampling, Diffusion MRI, Microstructure, Biophysical compartment models, Parallel computing, GPU computing

## 1 Introduction

Advances in microstructure modeling of diffusion Magnetic Resonance Imaging (dMRI) data have recently gained popularity since they possess greater specificity than Diffusion Tensor Imaging (DTI) in relating the dMRI signal to the underlying cellular microstructure, such as axonal density, orientation dispersion or diameter distributions. Typically, dMRI models are fitted to the data using non-linear optimization (Assaf et al., 2004; Assaf & Basser, 2005; Assaf et al., 2008; Panagiotaki et al., 2012; Zhang et al., 2012; Assaf et al., 2013; Fieremans et al., 2013; De Santis et al., 2014b,a; Jelescu et al., 2015b; Harms et al., 2017) or linear convex optimization (Daducci et al., 2015) methods to obtain a parameter point estimate per voxel. These point estimates provide scalar maps over the brain of micro-structural parameters, such as the fraction of restricted diffusion as a proxy for fiber density. These point estimates however do not include the uncertainty in the estimate, nor do they include the interdependency of parameters. The gold standard of obtaining these quantities is by using Monte Carlo Markov Chain (MCMC) sampling, as for example in (Behrens et al., 2003; Alexander, 2008; Alexander et al., 2010; Sotiropoulos et al., 2013). MCMC generates, per voxel, a multi-dimensional chain of samples, the stationary distribution of which is the posterior distribution, i.e. the probability density of the model parameters given the data. Per voxel, these samples capture parameter dependencies, multimodality and the width of peaks around optimal parameter values. For instance, summarizing the chain under Gaussian assumptions with a sample covariance matrix, would already provide mean parameter estimates and corresponding uncertainties (the standard deviation), as well as inter-parameter correlations (Figure 1). Despite these advantages, MCMC sampling is currently not routinely applied in dMRI microstructure modeling since it often requires adjustments

29 and tuning specific to each model, particularly in the choice of proposals,  
30 burn-in length, thinning and the number of samples to store. In addition,  
31 sampling often takes at least an order of magnitude more time than non-  
32 linear optimization.

33 Here we investigate the performance of a few variants of Random Walk  
34 Metropolis MCMC algorithms over multiple popular diffusion microstruc-  
35 ture models to see whether a single well performing variation could be  
36 applied efficiently and robustly to many models. To this end, we evalu-  
37 ate different strategies for adaptive proposals, burn-in and thinning with  
38 respect to diffusion MRI modeling. To determine a lower bound on the  
39 number of samples needed, we apply the concept of effective sample sizes  
40 to determine information content and posterior confidence. Finally, to re-  
41 duce run-time constraints we provide an efficient parallel GPU implemen-  
42 tation of all models and MCMC algorithms in the open source Microstruc-  
43 ture Diffusion Toolbox (MDT; <https://github.com/cbclab/MDT>).

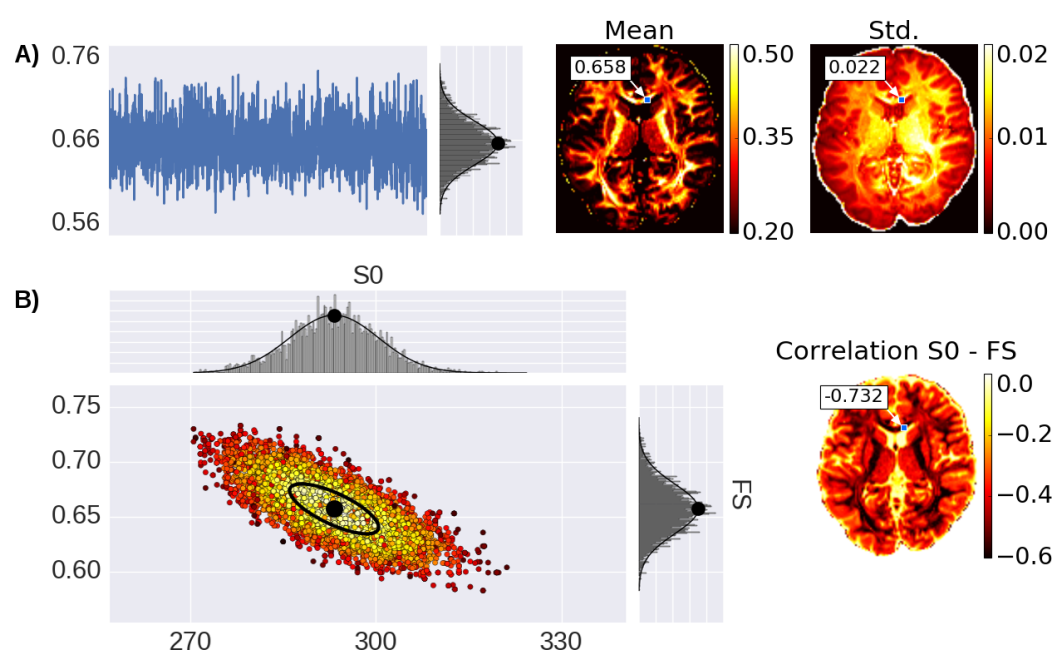

Figure 1: Illustration of parameter uncertainty and correlation for the Ball&Stick model using MCMC sampling, with the Fraction of Stick (FS) and the non-diffusion weighted signal intensity (S0). **A)** On the left, a single FS sampling trace and its corresponding histogram for the highlighted voxel with a Gaussian distribution function fitted to the samples with its mean indicated by a black dot. On the right, the mean and standard deviation (std.) maps generated from the independent voxel chains per voxel. **B)** On the left, the scatter-plot for two parameters (FS and S0) with the corresponding marginal histograms for the voxel highlighted in the maps. On the right, the S0-FS correlation map.

## 44 2 Methods

45 The biophysical (multi-)compartment models and the Markov Chain Monte  
 46 Carlo (MCMC) algorithms used in this study are implemented in a Python  
 47 based GPU accelerated toolbox (the Microstructure Diffusion Toolbox, MDT,  
 48 freely available under an open source L-GPL license at [https://github.](https://github.com/cbclab/MDT)  
 49 [com/cbclab/MDT](https://github.com/cbclab/MDT)). Its modular design allows arbitrary combinations of  
 50 models with likelihood and prior distributions. The MCMC implemen-  
 51 tations are voxel-wise parallelized using the OpenCL framework, allow-  
 52 ing parallel computations on multi-core CPU and/or Graphics Processing  
 53 Units (GPUs).

54 We use the models and MCMC routine as implemented in MDT version  
 55 0.10.9. Unless stated otherwise, we initialize the MCMC sampling with a  
 56 Maximum Likelihood Estimator (MLE) obtained from non-linear paramete-  
 57 r optimization using the Powell routine with cascaded model initializa-  
 58 tion (Harms et al., 2017).

59 First, we define and review posteriors, likelihoods and priors relevant  
 60 to diffusion multi-compartment models. We next define the Metropolis-  
 61 Hastings as the general type of Markov Chain Monte Carlo algorithms  
 62 used in this work. Then, under assumptions of symmetric and current  
 63 position centered proposals, updated one dimension at a time, we derive  
 64 the Metropolis-Within-Gibbs algorithm. The Metropolis-Within-Gibbs al-  
 65 gorithm is then explained with and without the use of adaptive proposals.  
 66 We subsequently define burn-in, thinning, effective sample size and num-  
 67 ber of samples as the targets of investigation for diffusion microstructure  
 68 models.

### 69 2.1 Posterior, likelihoods and priors

70 Given observations  $\mathcal{O}$  and a model with parameters  $\mathbf{x} \in \mathbb{R}^n$ , we can con-  
 71 struct a posterior distribution  $p(\mathbf{x}|\mathcal{O})$  from a log-likelihood distribution  
 72  $l(\mathcal{O}|\mathbf{x})$  and prior distribution  $p(\mathbf{x})$ , as:

$$p(\mathbf{x}|\mathcal{O}) \propto l(\mathcal{O}|\mathbf{x}) + \ln p(\mathbf{x}) \quad (1)$$

73 In this work we are interested in approximating the posterior density of  
 74  $p(\mathbf{x}|\mathcal{O})$  using MCMC sampling.

### 75 2.1.1 Likelihood distribution

76 The likelihood distribution  $l(\mathcal{O}|\mathbf{x})$  contains a signal model, embedding the  
77 diffusion microstructure modeling assumptions combined with a noise  
78 model. As discussed in previous work (Harms et al., 2017; Panagiotaki  
79 et al., 2012; Alexander, 2009), we use the Offset Gaussian model as likeli-  
80 hood distribution:

$$l(\mathcal{O}|\mathbf{x}) = -\frac{\sum \left( \mathcal{O} - \sqrt{\mathbf{S}(\mathbf{x})^2 + \sigma^2} \right)}{2\sigma^2} - m \cdot \log(\sigma\sqrt{2\pi}) \quad (2)$$

81 with  $l(\mathcal{O}|\mathbf{x})$  the log-likelihood function,  $\mathbf{x}$  the parameter vector,  $\mathcal{O}$  the ob-  
82 servations (the data volumes),  $\mathbf{S}(\mathbf{x})$  the signal model,  $\sigma$  the standard de-  
83 viation of the Gaussian distributed noise (of the complex valued data, i.e.  
84 before calculation of magnitude data) and  $m$  the number of volumes in  
85 the dataset (number of observations). We estimated  $\sigma$  a priori from the re-  
86 constructed magnitude images using the  $\sigma_{\text{mult}}$  method in (Dietrich et al.,  
87 2007, eq. A6). For signal model naming we use the postfix ‘\_in[n]’ to iden-  
88 tify the number of restricted compartments employed in models which  
89 allow multiple intra-axonal compartments (Harms et al., 2017). For ex-  
90 ample, CHARMED\_in2 indicates a CHARMED model with 2 intra-axonal  
91 compartments (and the regular single extra-axonal compartment), for each  
92 of two unique fiber orientations in a voxel.

### 93 2.1.2 Priors

94 The prior distribution  $p(\mathbf{x})$  describes the a priori knowledge we have about  
95 the model and its parameters. We construct a complete model prior as  
96 a product of priors per parameter,  $p_i(\mathbf{x}_i)$  (see table 1), with one or more  
97 model specific priors over multiple parameters,  $p_j(\mathbf{x}|M)$ , for model prior  $j$   
98 of model  $M$  (see table 2):

$$p(\mathbf{x}) = \prod p_i(\mathbf{x}_i) \cdot \prod p_j(\mathbf{x}|M) \quad (3)$$

99 Assuming no further a priori knowledge than logical or biologically plau-  
100 sible ranges, we use uniform priors for each parameter,  $p_i(\mathbf{x}_i) \sim U(a, b)$ .  
101 Additionally, for multi-compartment models with volume fraction weighted  
102 compartments (i.e. Ball&Stick\_in1, NODDI and CHARMED\_in1) we add  
103 a prior on the  $n - 1$  volume fractions  $w_k$  to ensure  $\sum_{k=0}^{n-1} w_k \leq 1$ , to en-  
104 sure proper volume fraction weighting. Note that the last volume fraction

is not sampled but is set to one minus the sum of the others,  $w_n = 1 - \sum_{k=0}^{n-1} w_k$ . To the Tensor compartment (used in the Tensor and CHARMED\_in1 model), we add a prior to ensure strictly decreasing diffusivities ( $d > d_{\perp_0} > d_{\perp_1}$ ), this prevents parameter aliasing of the Tensor orientation parameters (see (Gelman et al., 2013) on aliasing).

| Parameter                  | Prior                                  | Used in model(s)                           |
|----------------------------|----------------------------------------|--------------------------------------------|
| $S_0$                      | $U(0, 1 \cdot 10^{10})$                | Tensor, Ball&Stick_in1, NODDI, CHARMED_in1 |
| $w_i$                      | $U(0, 1)$                              | Ball&Stick_in1, NODDI, CHARMED_in1         |
| $d_{\parallel}$ (or $d$ )  | $U(3 \cdot 10^{-11}, 1 \cdot 10^{-8})$ | Tensor, Ball&Stick_in1, NODDI, CHARMED_in1 |
| $d_{\perp_1}, d_{\perp_2}$ | $U(0, 1 \cdot 10^{-8})$                | Tensor, CHARMED_in1                        |
| $\theta, \phi$             | $U(0, \pi)$                            | Tensor, Ball&Stick_in1, NODDI, CHARMED_in1 |
| $\psi$                     | $U(0, \pi)$                            | Tensor                                     |
| $\kappa$                   | $U(0, 2\pi)$                           | NODDI                                      |

Table 1: The priors  $p_i(\mathbf{x}_i)$  per model parameter. These priors are combined with the model specific parameters in table 2 to form the complete model priors. For parameter usage and specification see (Harms et al., 2017).

| Model ( $M$ )                                  | Prior                                                                                       |
|------------------------------------------------|---------------------------------------------------------------------------------------------|
| BallStick_in1, NODDI, CHARMED_in1              | $p_j(\mathbf{x}, M) = 1$ if $\sum_{k=0}^{n-1} w_k \leq 1$ , else $p_j(\mathbf{x}, M) = 0$   |
| Tensor, CHARMED_in1 (extra axonal compartment) | $p_j(\mathbf{x}, M) = 1$ if $d > d_{\perp_0} > d_{\perp_1}$ , else $p_j(\mathbf{x}, M) = 0$ |

Table 2: The model priors  $p_j(\mathbf{x}|M)$  for model  $M$ . Each of these priors should be interpreted as a boolean, that is, they return a value of 1 if the condition is fulfilled, else they return 0. These priors are combined with the parameter specific priors in table 1 to form the complete model priors.

## 2.2 Markov Chain Monte Carlo

Markov Chain Monte Carlo (MCMC) is a class of numerical approximation algorithms for sampling from the probability density function  $\pi(\cdot)$



113 of a target random variate, by generating a Markov chain  $\mathbf{X}^{(0)}, \mathbf{X}^{(1)}, \dots$   
 114 with stationary distribution  $\pi(\cdot)$ . There are a large number of MCMC algo-  
 115 rithms, including Metropolis-Within-Gibbs (a.k.a Metropolis) (Metropolis  
 116 et al., 1953), Metropolis-Hastings (Hastings, 1970), Gibbs (Turchin, 1971;  
 117 Geman & Geman, 1984), Component-wise Hit-And-Run Metropolis (Turchin,  
 118 1971; Smith, 1984), Random Walk Metropolis (Muller, 1994), Multiple-Try  
 119 Metropolis (Liu et al., 2000), No-U-Turn sampler (Hoffman & Gelman,  
 120 2011) and many more. All of these algorithms are known as special cases  
 121 of the Metropolis-Hastings algorithm and differ only in the proposal dis-  
 122 tributions they employ (Johnson et al., 2013; Chib & Greenberg, 1995).

The general Metropolis-Hastings algorithm works as follows. Given a cur-  
 rent position  $\mathbf{X}^{(t)}$  at step  $t$  on a  $p$ -dimensional Markov chain, a new posi-  
 tion  $\mathbf{X}^{(t+1)}$  is obtained by generating a candidate position  $\mathbf{Y}$  from the pro-  
 posal density  $q(\mathbf{X}^{(t)}|\cdot)$ , which is then either accepted with probability  $\alpha$ ,  
 or rejected with probability  $1 - \alpha$ . If the candidate position is accepted,  
 $\mathbf{X}^{(t+1)} = \mathbf{Y}$ , else,  $\mathbf{X}^{(t+1)} = \mathbf{X}^{(t)}$ . The acceptance criteria  $\alpha$  is a function  
 given by (Hastings, 1970):

$$\alpha(\mathbf{X}^{(t)}, \mathbf{Y}) = \min \left( 1, \frac{\pi(\mathbf{Y})}{\pi(\mathbf{X}^{(t)})} \frac{q(\mathbf{X}^{(t)}|\mathbf{Y})}{q(\mathbf{Y}|\mathbf{X}^{(t)})} \right) \quad (4)$$

123 where  $\pi(\cdot)$  is our target density, generally given by our posterior distribu-  
 124 tion function  $p(\mathbf{X}|\cdot)$ . The subsequent collection of points  $\{\mathbf{X}^{(0)}, \dots, \mathbf{X}^{(s)}\}$   
 125 for a sample size  $s$  is called the chain and is the algorithm's output. The  
 126 *ergodic* property of this algorithm guarantees that this chain converges (in  
 127 the long run) to a stationary distribution which approximates the target  
 128 density function  $\pi(\cdot)$  (Metropolis et al., 1953; Hastings, 1970).

129 In this work we use a symmetric proposal distribution centered around  
 130 the current sampling position for every dimension (every component) of  
 131 the sampled multivariate distribution. If the proposal distribution  $q$  is  
 132 symmetric, i.e.  $q(\mathbf{X}^{(t)}|\mathbf{Y}) = q(\mathbf{Y}|\mathbf{X}^{(t)})$  we can drop Hasting's addition to  
 133 the acceptance criteria function, simplifying it to the Metropolis criteria  
 134 (Metropolis et al., 1953):

$$\alpha(\mathbf{X}^{(t)}, \mathbf{Y}) = \min \left( 1, \frac{\pi(\mathbf{Y})}{\pi(\mathbf{X}^{(t)})} \right) \quad (5)$$

135 If furthermore  $q(\mathbf{X}^{(t)}|\mathbf{Y}) = q(\mathbf{X}^{(t)} - \mathbf{Y}) = q(\mathbf{Y} - \mathbf{X}^{(t)})$ , that is, the pro-  
 136 posal is centered around  $\mathbf{X}^{(t)} \forall t$ , we typically denote it as the Random

137 Walk Metropolis algorithm (Robert, 2015; Chib & Greenberg, 1995; John-  
138 son et al., 2013; Sherlock et al., 2010; Muller, 1994; Hastings, 1970; Metropo-  
139 lis et al., 1953)..

### 140 2.2.1 Metropolis-Within-Gibbs

141 In the component wise updating scheme, a new position  $\mathbf{X}^{(t+1)}$  is pro-  
142 posed one component (i.e. one dimension) at a time, in contrast to up-  
143 dating all  $p$  dimensions at once. Since such a single component updating  
144 Random Walk Metropolis algorithm uses elements both of Gibbs sampling  
145 and of Metropolis-Hastings, this scheme is also referred to as Metropolis-  
146 Within-Gibbs (MWG) (van Ravenzwaaij et al., 2016; Robert, 2015; Sherlock  
147 et al., 2010). Let  $\mathbf{X}^{(t)} = (\mathbf{X}_0^{(t)}, \dots, \mathbf{X}_p^{(t)})$  define the components  $\mathbf{X}_i^{(t)}$  of  $\mathbf{X}^{(t)}$ ,  
148 then we can define

$$\mathbf{Y}_i = (\mathbf{X}_0^{(t+1)}, \dots, \mathbf{X}_{i-1}^{(t+1)}, \mathbf{Y}_i^*, \mathbf{X}_{i+1}^{(t)}, \dots, \mathbf{X}_p^{(t)})$$

149 as the candidate position for component  $i$ , and

$$\mathbf{X}^{(t+1)*} = (\mathbf{X}_0^{(t+1)}, \dots, \mathbf{X}_{i-1}^{(t+1)}, \mathbf{X}_i^{(t)}, \mathbf{X}_{i+1}^{(t)}, \dots, \mathbf{X}_p^{(t)})$$

150 as the temporary position in the chain while component  $i$  is being updated.  
151 The proposals  $\mathbf{Y}_i^*$  are generated using the symmetric proposal  $q_i(\mathbf{X}^{(t+1)*} | \cdot)$   
152 which updates the  $i$ th component dependent on the components already  
153 updated. One iteration of the MWG algorithm cycles through all  $i$  com-  
154 ponents, where each proposal  $\mathbf{Y}_i$  is accepted or rejected using probability  
155  $\alpha(\mathbf{X}^{(t+1)*}, \mathbf{Y}_i)$ .

### 156 2.3 Proposal distributions

157 As symmetric proposal distributions for our MWG algorithm we use cen-  
158 tered Normal distributions, i.e.  $q_i(\mathbf{X}^{(t+1)*} | \cdot) \sim \mathcal{N}(\mathbf{X}_i^{(t)}, \sigma_i)$ , where  $\sigma_i$  is the  
159 proposal standard deviation of the  $i$ th component (not to be confused with  
160 the  $\sigma$  used in the likelihood distribution above). For the orientation param-  
161 eters  $\theta$ ,  $\phi$  and  $\psi$  we use a circular Normal modulus  $\pi$ , i.e.  $q_i(\mathbf{X}^{(t+1)*} | \cdot) \sim$   
162  $\mathcal{N}(\mathbf{X}_i^{(t)}, \sigma_i) \bmod \pi$ . See table 3 for an overview of the default proposal  
163 distributions used per parameter.



| Parameter                                                | Prior                                              |
|----------------------------------------------------------|----------------------------------------------------|
| $S_0$                                                    | $\mathcal{N}(\mathbf{X}_i^{(t)}, 10)$              |
| $w_i$                                                    | $\mathcal{N}(\mathbf{X}_i^{(t)}, 0.01)$            |
| $d_{\parallel}$ (or $d$ ), $d_{\perp 1}$ , $d_{\perp 2}$ | $\mathcal{N}(\mathbf{X}_i^{(t)}, 1 \cdot 10^{-8})$ |
| $\theta, \phi, \psi$                                     | $\mathcal{N}(\mathbf{X}_i^{(t)}, 0.1) \bmod \pi$   |
| $\kappa$                                                 | $\mathcal{N}(\mathbf{X}_i^{(t)}, 0.01)$            |

Table 3: The proposal distributions  $q_i(\mathbf{X}^{(t+1)*} | \cdot)$  per model parameter with their default proposal standard deviations. For parameter usage and specification see (Harms et al., 2017).

## 164 2.4 Adaptive Metropolis

165 While in the traditional Metropolis-Within-Gibbs algorithm each  $\sigma_i$  in the  
166 proposal distribution is fixed, variations of this algorithm exist that auto-  
167 tune each  $\sigma_i$  to improve the information content of the Markov chain.  
168 While technically each of these variations is a distinct MCMC algorithm,  
169 we consider and compare three of these variations here as proposal updat-  
170 ing strategies for the MWG algorithm.

171 The first adaptation strategy compared is the Single Component Adaptive  
172 Metropolis (SCAM) algorithm (Haario et al., 2005), which works by adapt-  
173 ing the proposal standard deviation to the empirical standard deviation of  
174 the component’s marginal distribution. That is, the standard deviation  $\sigma_i^{(t)}$   
175 for the proposal distribution of the  $i$ th component at time  $t$  is given by:

$$\sigma_i^{(t)} = \begin{cases} \sigma_i^{(0)}, & t \leq t_s \\ 2.4 * \sqrt{\text{Var}(\mathbf{X}_i^{(0)}, \dots, \mathbf{X}_i^{(t-1)})} + 1 \cdot 10^{-20}, & t > t_s \end{cases} \quad (6)$$

176 where  $t_s$  denotes the iteration after which the adaptation starts (we use  
177  $t_s = 100$ ). A small constant is necessary to prevent the standard deviation  
178 from shrinking to zero. This adaptation algorithm has been proven to re-  
179 tain ergodicity, meaning it is guaranteed to converge to the right stationary  
180 distribution (Haario et al., 2005).

181 The other two methods work by adapting the acceptance rate of the gen-  
182 erated proposals. The acceptance rate is the ratio of accepted to generated

183 proposals and is typically updated batch-wise. In general, by decreasing  
184 the proposal standard deviation the acceptance rate increases and vice  
185 versa. Theoretically, for single component updating schemes (like in this  
186 work), the optimal target acceptance rate is 0.44 (Gelman et al., 1996).

187 The first of the two acceptance rate scaling strategies is from the FSL Bed-  
188 postX software package. This strategy, which we refer to as the *FSL* strat-  
189 egy, tunes the acceptance rate to 0.5 (Behrens et al., 2003). It works by  
190 multiplying the proposal variance by the ratio of accepted to rejected sam-  
191 ples, i.e. it multiplies the standard deviation  $\sigma_i$  by  $\sqrt{a/(b-a)}$  after every  
192 batch of size  $b$  with  $a$  accepted samples. We update the proposals after ev-  
193 ery batch of size 50 ( $b = 50$ ) (Behrens et al., 2003). Since this method never  
194 ceases the adaptation of the standard deviations, it theoretically loses er-  
195 godicity of the chain (Roberts & Rosenthal, 2009, 2007).

196 The last method, the Adaptive Metropolis-Within-Gibbs (AMWG) method  
197 (Roberts & Rosenthal, 2009) uses the current acceptance rate over batches  
198 to tune the acceptance rate to 0.44. After the  $n$ th batch of 50 iterations  
199 (Roberts & Rosenthal, 2009), this method updates the logarithm of  $\sigma_i$  by  
200 adding or subtracting an adoption amount  $\delta(n) = \sqrt{1/n}$  depending on the  
201 acceptance rate of that batch. That is, after every batch,  $\sigma_i$  is updated by:

$$\sigma_i^{(t)} = \begin{cases} \sigma_i^{(t-n)} \cdot \exp(\delta(n)), & \text{ar}_{batch} > \text{ar}_{target} \\ \sigma_i^{(t-n)} / \exp(\delta(n)), & \text{ar}_{batch} \leq \text{ar}_{target} \end{cases} \quad (7)$$

202 where  $\text{ar}_{batch}$  is the acceptance rate of the current batch and  $\text{ar}_{target}$  is the  
203 target acceptance rate (0.44). Since this method features diminishing adap-  
204 tation, the chain remains ergodic (Roberts & Rosenthal, 2009).

205 We compare all three strategies and the default, no adaptation, on the  
206 number of effective samples they generate (see below) and on accuracy  
207 and precision using ground truth simulation data. We sample all models  
208 with 10000 samples, without thinning, using the point optimized Maxi-  
209 mum Likelihood Estimator (MLE) as starting point and with a burn-in of  
210 1000. Estimates of the standard error of the mean (SEM) are obtained by  
211 averaging the statistics over 10 independent MCMC runs.

## 212 2.5 Burn-in

Burn-in is the process of discarding the first  $z$  samples from the chain and using only the remaining samples in subsequent analysis. The idea is that

if the starting point had a low probability then the limited number of early samples may oversample low probability regions. By discarding the first  $z$  samples as a burn-in, the hope is that, by then, the chain has converged to its stationary distribution and that all further samples are directly from the stationary distribution (Robert, 2015). Theoretically, burn-in is unnecessary since any empirical average

$$\hat{\mu}_T(g) = \frac{1}{T} \sum_{t=0}^T g(\mathbf{X}^{(t)}) \quad (8)$$

for any function  $g$  will convert to  $\mu(g)$  given a large enough sample size and given that the chain is ergodic (Robert, 2015). Additionally, since it can not be predicted how long it will take for the chain to reach convergence, the required burn-in can only be estimated post-hoc. In practice, discarding the first few thousand samples as a burn-in often works and is less time-consuming than generating a lot of samples to average out the effects of a low probability starting position.

An alternative to burn-in, or, to reduce the need for burn-in, is to use a Maximum Likelihood Estimator as starting point for the MCMC sampling (van Ravenzwaaij et al., 2016). If the optimization routine did its work well, the MLE should be part of the stationary distribution of the Markov chain, removing the need for burn-in altogether. We compare initialization using a MLE obtained using the Powell routine (Harms et al., 2017), with a initialization from a default a priori value (table 4). For most models the MLE optimization results can be used directly, for the Tensor model we sometimes need to sort the diffusivities and reorient the  $\theta$ ,  $\phi$  and  $\psi$  angles to ensure decreasing diffusivities. To evaluate the effect of burn-in and initialization single-slice datas was sampled using the NODDI model with the default starting point and with MLE. For selected single voxels the NODDI model was also sampled using the MLE starting point and two random volume fractions as a starting point.

## 2.6 Thinning

Thinning is the process of using only every  $k$ th step of the chain for analysis, while all other steps are discarded, with as goal reducing autocorrelation and obtaining relatively independent samples. Several authors have recommended against the use of thinning, stating that it is often unnecessary, always inefficient and reduces the precision of the posterior estimates

| Parameter                 | Default starting value |
|---------------------------|------------------------|
| $S_0$                     | $1 \cdot 10^4$         |
| $w_i$                     | 0.5                    |
| $d_{\parallel}$ (or $d$ ) | $1.7 \cdot 10^{-9}$    |
| $d_{\perp_1}$             | $1.7 \cdot 10^{-10}$   |
| $d_{\perp_2}$             | $1.7 \cdot 10^{-11}$   |
| $\theta, \phi, \psi$      | $\pi/2$                |
| $\kappa$                  | 1                      |

Table 4: The default starting points for the MCMC sampler, used only when the sampler is not initialized with a maximum likelihood estimator.

(Link & Eaton, 2012; MacEachern & Berliner, 1994; Jackman, 2009; Geyer, 1991; Christensen et al., 2010).

The only valid reason for thinning is to avoid bias in the standard error estimate of posterior mean, when that mean estimate was computed over all (non thinned) samples (Link & Eaton, 2012; MacEachern & Berliner, 1994). In general, thinning is only considered worthwhile if there are storage limitations, or when the cost of processing the output outweighs the benefits of reduced variance of the estimator (Geyer, 1991; MacEachern & Berliner, 1994; Link & Eaton, 2012).

To evaluate the effect of thinning we sampled a single voxel with 20000 samples and compared the effect of using all samples in computing the posterior mean and posterior standard deviation of a volume fraction against using only a thinned amount of samples. We compare the effect of taking  $n$  samples with a thinning of  $k$  (the *thinning* method) against just using all  $n \cdot k$  samples (the *more samples* method).

## 2.7 Effective Sample Size

The Effective Sample Size (ESS) in the context of MCMC, measures the information content, or effectiveness of a sample chain. For example, 1000 samples with an ESS of 200 have a higher information content than 2000 samples with an ESS of 100. The ESS can be defined as the minimum size of a set of posterior samples (taken directly from the posterior), which have the same efficiency (measure of quality) in the posterior density estimation as a given chain of samples obtained from MCMC sampling (Mar-

263 tino et al., 2017). Conversely, ESS theory can quantify how many samples  
 264 should be taken in a chain to reach a given quality of posterior estimates.  
 265 We use the ESS theory to comparing proposal adaptation strategies and to  
 266 estimating the minimum number of samples necessary for adequate sam-  
 267 pling of diffusion microstructure models.

268 Multivariate ESS theory (Vats et al., 2015) is an extension of univariate ESS  
 269 theory (Gong & Flegal, 2016; Liu, 2004; Robert & Casella, 2004; Kass et al.,  
 270 1998) and computes the empirical ESS as:

$$\widehat{\text{ESS}} = s \left( \frac{|\Lambda_s|}{|\Sigma_s|} \right)^{1/p} \quad (9)$$

271 with  $s$  is the number of obtained samples,  $p$  the number of parameters,  
 272  $\Lambda_s$  the covariance matrix of the samples and  $\Sigma_s$  an estimate of the Monte  
 273 Carlo standard error (the error in the chain caused by the MCMC sampling  
 274 process), here calculated using a batch means algorithm (Vats et al., 2015).

## 275 2.8 Number of samples

276 The multivariate ESS theory dictates that one can terminate the sampling  
 277 when the empirical number of effective samples,  $\widehat{\text{ESS}}$ , satisfies:

$$\widehat{\text{ESS}} \geq W(p, \alpha, \epsilon) \quad (10)$$

278 where  $W(p, \alpha, \epsilon)$  gives a theoretical lower bound with  $p$  the number of  
 279 parameters in the model,  $\alpha$  the level of confidence of a desired confidence  
 280 region and  $\epsilon$  a desired relative precision (the relative contribution of Monte  
 281 Carlo error to the variability in the target distribution).  $W(p, \alpha, \epsilon)$  can be  
 282 determined a priori and is defined as:

$$W(p, \alpha, \epsilon) = \frac{2^{2/p} \pi}{(p \Gamma(p/2))^{2/p}} \frac{\chi_{1-\alpha, p}^2}{\epsilon^2} \quad (11)$$

283 with  $\chi^2$  the chi-square function and  $\Gamma(\cdot)$  the Gamma function (Vats et al.,  
 284 2015). Figure 2 shows the effect of  $\alpha$  and  $\epsilon$  on  $W(p, \alpha, \epsilon)$ . Given the expo-  
 285 nential increase in the number of samples need for very high confidence  
 286 and precision, we aim for a 95% confidence region ( $\alpha = 0.05$ ) with a 90%  
 287 precision ( $\epsilon = 0.1$ ) in this work.

Since online monitoring of the ESS (during MCMC sampling) is an expensive operation, and terminating on ESS will yield different sample sizes for different voxels, we instead use the ESS theory to estimate a fixed minimum number of samples needed to reach a desired ESS when averaged over a white matter mask. We sampled with the BallStick<sub>in1</sub>, Tensor, NODDI and CHARMED<sub>in1</sub> models, using respectively 15000, 20000, 20000 and 30000 samples and computed from those samples the average ESS over white matter masks. For  $\alpha = 0.05$  and  $\epsilon = 0.1$  we computed per model the theoretical minimum required effective sample size  $W(p, \alpha, \epsilon)$ . We compared those theoretical numbers to the obtained average effective sample size and estimated a minimum required number of samples  $\hat{s}$  using the ratio:

$$\hat{s} = s + \frac{W(p, \alpha, \epsilon) - \widehat{\text{ESS}}}{\widehat{\text{ESS}}/s} \quad (12)$$

where  $s$  is the number of samples we started out with,  $W(p, \alpha, \epsilon)$  the theoretical ESS requirements and  $\widehat{\text{ESS}}$  the estimated number of effective samples in our chain when averaged over the white matter mask. As an estimate of computation times, we record runtime statistics for sampling the recommended number of samples using an AMD Fury X graphics card.

## 2.9 Datasets

For this study we used two groups of ten subjects coming from two studies, each with a different acquisition protocol. The first ten subjects are from the freely available fully preprocessed dMRI data from the USC-Harvard consortium of the Human Connectome project. Data used in the preparation of this work were obtained from the MGH-USC Human Connectome Project (HCP) database (<https://ida.loni.usc.edu/login.jsp>). The data were acquired on a specialized Siemens Magnetom Connectom with 300mT/m gradient set (Siemens, Erlangen, Germany). These datasets were acquired at a resolution of 1.5mm isotropic with  $\Delta=21.8\text{ms}$ ,  $\delta=12.9\text{ms}$ ,  $\text{TE}=57\text{ms}$ ,  $\text{TR}=8800\text{ms}$ , Partial Fourier = 6/8, MB factor 1 (i.e. no simultaneous multi-slice), in-plane GRAPPA acceleration factor 3, with 4 shells of  $b=1000, 3000, 5000, 10,000 \text{ s/mm}^2$ , with respectively 64, 64, 128, 393 directions to which are added 40 interleaved  $b_0$  volumes leading to 552 volumes in total per subject, with an acquisition time of 89 minutes. We refer to these datasets as *HCP MGH - 1.5mm -552vol - b10k* and to the multi-shell direction table as the *HCP MGH* table. These four-shell, high

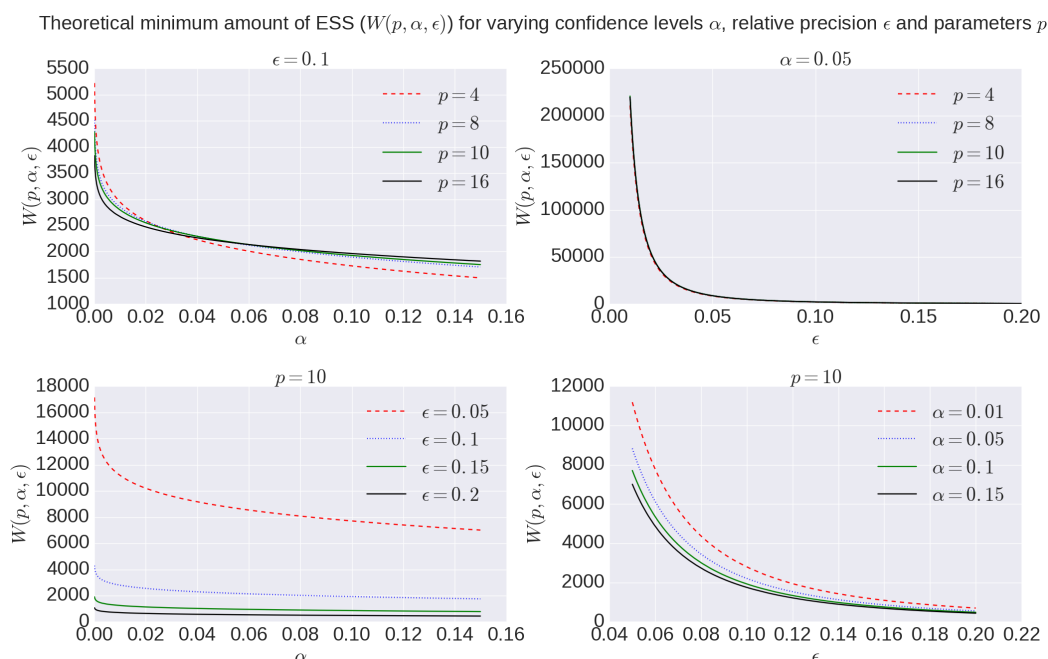

Figure 2: Overview of theoretical minimum ESS,  $W(p, \alpha, \epsilon)$ , to reach a specific confidence level  $\alpha$  with a desired relative precision  $\epsilon$  for a model with number of parameters  $p$ .

number of directions, and very high maximum b- value datasets allow a wide range of models to be fitted.

The second set of ten subjects comes from the diffusion protocol pilot phase of the Rhineland Study ([www.rheinland-studie.de](http://www.rheinland-studie.de)) and was acquired on a Siemens Magnetom Prisma (Siemens, Erlangen, Germany) with the Center for Magnetic Resonance Research (CMRR) multi-band (MB) diffusion sequence (Moeller et al., 2010; Xu et al., 2013). These datasets had a resolution of 2.0mm isotropic with  $\Delta=45.8\text{ms}$ ,  $\delta=16.3\text{ms}$  and  $\text{TE}=90\text{ms}$ ,  $\text{TR}=4500\text{ms}$  Partial Fourier = 6/8, MB factor 3, no in-plane acceleration with 3 shells of  $b=1000, 2000, 3000 \text{ s/mm}^2$ , with respectively 30, 40 and 50 directions to which are added 14 interleaved  $b_0$  volumes leading to 134 volumes in total per subject, with an acquisition time of 10 min 21 sec. Additional  $b_0$  volumes were acquired with a reversed phase encoding direction which were used to correct susceptibility related distortion (in addition to bulk subject motion) with the topup and eddy tools in FSL version 5.0.9. We refer to these datasets as *RLS - 2mm - 134dir - b3k* and to the multi-shell direction table as the *RLS* table. These three-shell datasets represent a relatively short time acquisition protocol that still allows many models to be fitted.



341 Since the Tensor model is only valid for b-values up to about  $1200\text{s/mm}^2$ ,  
 342 we only use the b-value  $1000\text{s/mm}^2$  shell and b0 volumes during model  
 343 optimization and sampling. All other models are estimated on all data  
 344 volumes. For all datasets we created a white matter (WM) mask and, using  
 345 BET from FSL (Smith, 2002), a whole brain mask. The whole brain mask  
 346 is used during sampling, whereas averages over the WM mask are used  
 347 in model or data comparisons. The WM mask was calculated by applying  
 348 a lower threshold of 0.3 on the Tensor FA results, followed by a double  
 349 pass 3D median filter of radius 2 in all directions. The Tensor estimate for  
 350 this mask generation was calculated using a CI Ball Stick/Tensor cascade  
 351 optimized with the Powell method (Harms et al., 2017).

## 352 2.10 Ground truth simulations

353 We performed ground truth simulations to illustrate the effects of the adap-  
 354 tive proposals on the accuracy and precision of parameter estimation. For  
 355 all models in the study, we simulated 10000 repeats with random volume  
 356 fractions, diffusivities and orientations, using both a HCP MGH and a RLS  
 357 multi-shell direction table with Rician noise of an SNR of 30. For the Ten-  
 358 sor model we only use the b-value  $1000\text{s/mm}^2$  shell and b0 volumes of the  
 359 acquisition tables. To ensure Gaussianity of the sampled parameter distri-  
 360 butions, we generate the parameters with a smaller range than the support  
 361 of the sampling priors (table 5). To allow an uniform SNR of 30 we fix  $S_0$   
 362 to  $1 \cdot 10^4$ .

363 Analogous to (Harms et al., 2017), we compute estimation error as the  
 364 mean of the (marginal) posterior minus ground truth parameter value for  
 365 the intra-axonal volume fraction, i.e. fraction of stick (FS) for Ball&Sticks\_-  
 366 in1, fraction of restricted (FR) for CHARMED\_in1 and fraction of restricted  
 367 (FR) for NODDI. We compute a measure of accuracy as the inverse of the  
 368 mean of the average estimate error over ten thousand random repeats and  
 369 a measure of precision as the inverse of the standard deviation of the aver-  
 370 age estimates. Finally, we aggregate these results per model and per exper-  
 371 iment over 10 independent ground truth simulation trials into a mean and  
 372 standard error of the mean (SEM) for both accuracy and precision. When  
 373 reported, the effective sample size (ESS) is computed using the multivari-  
 374 ate ESS theory, averaged over the 10000 voxels with again a SEM over 10  
 375 trials.

| Parameter                          | Lower bound        | Upper bound       |
|------------------------------------|--------------------|-------------------|
| $w_i$                              | 0.2                | 0.8               |
| $d_{  }, d_{\perp 1}, d_{\perp 2}$ | $5 \cdot 10^{-11}$ | $5 \cdot 10^{-9}$ |
| $\theta, \phi, \psi$               | 0                  | $\pi$             |
| $\kappa$                           | 0.1                | $2\pi$            |

Table 5: The simulation ranges per model parameters. We generate uniformly distributed parameter values using the upper and lower bounds presented.

### 3 Results

We begin by comparing the four different proposal strategies for sampling the different microstructure compartment models: Tensor, Ball&Sticks\_in1, CHARMED\_in1 and NODDI. We then present burn-in and thinning given an effective proposal strategy, and end with ESS estimates on the minimum number of samples needed for adequate characterization of the posterior distribution.

#### 3.1 Adaptive proposal strategies

We compare three different adaptive proposal strategies, the Single Component Adaptive Metropolis (SCAM), the FSL acceptance rate scaling (FSL) and the Adaptive Metropolis-Within-Gibbs (AMWG), against the default of no adaptive proposals (None). Comparisons are based on multivariate Effective Sample Size, and accuracy and precision using ground truth simulations. Figure 3 illustrates the effect of using MCMC algorithms with adaptive proposal strategies using the Ball&Stick\_in1 model, the HCP MGH dataset, an initial standard deviation of 0.25, after a burn-in of 1000 steps. The illustration clearly shows that without adaptive proposals the chain can get stuck in the same position for quite some time, while all adaptive proposal methods can adapt the standard deviations to better cover the support of the posterior distribution.

The empirical ESS (eq. 9) measures the information content or effectiveness of a sample chain. As such, comparing the ESS for an equal number of actual samples for different proposal strategies evaluates how effectively each strategy generates useful information about the posterior distribution. Figure 4 shows that all adaptive methods clearly outperform the default, None, by generating about 2~3 times more effective samples

for equal length chains. The AMWG method generates the largest ESS in all cases, although with a small margin compared to the other two adaptive methods. Compared on accuracy and precision in ground truth simulations (figure 5), the adaptive proposal methods again show a general advantage against no adaptations. Here, the SCAM strategy performs slightly better (highest accuracy and precision) than the other adaptive methods for the lower number of parameter models (BallStick\_r1, Tensor) while the AMWG method performs slightly better in the higher number of parameter models (NODDI, CHARMED\_r1). Generally the performance differences in accuracy and precision between the adaptive methods are not large, and both the SCAM and AWG perform well. Given the high alround efficiency, accuracy and precision and the maintained ergodicity of the chain in the AMWG method, we selected this method to generate chains in the rest of this work.

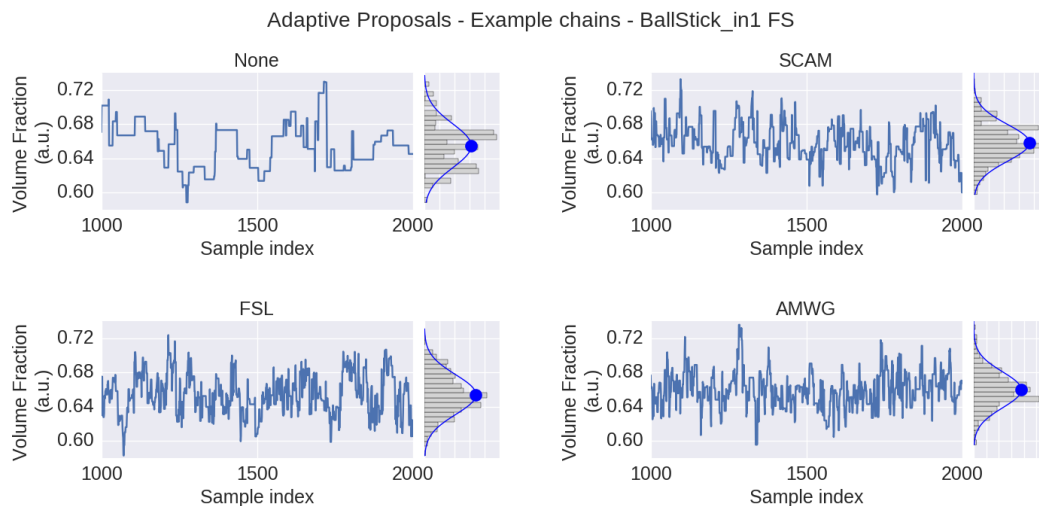

Figure 3: MCMC sample traces for the voxel indicated in figure 1, using Ball&Stick.in1 Fraction of Stick (FS), for no adaptive metropolis (None), the Single Component Adaptive Metropolis (SCAM), the FSL acceptance rate scaling (FSL) and Adaptive Metropolis-Within-Gibbs (AMWG) adaptive proposal methods. Results were computed with an initial proposal standard deviation of 0.25. A Gaussian distribution function was fitted to the samples, superimposed in blue on the sample histograms, with its mean indicated by the blue dot.

### 3.2 Burn-in

Figure 6 shows a comparison of mean and standard deviation estimates over 10,000 samples (no thinning), between sampling started from the default starting point (table 4) and from a Maximum Likelihood Estimator

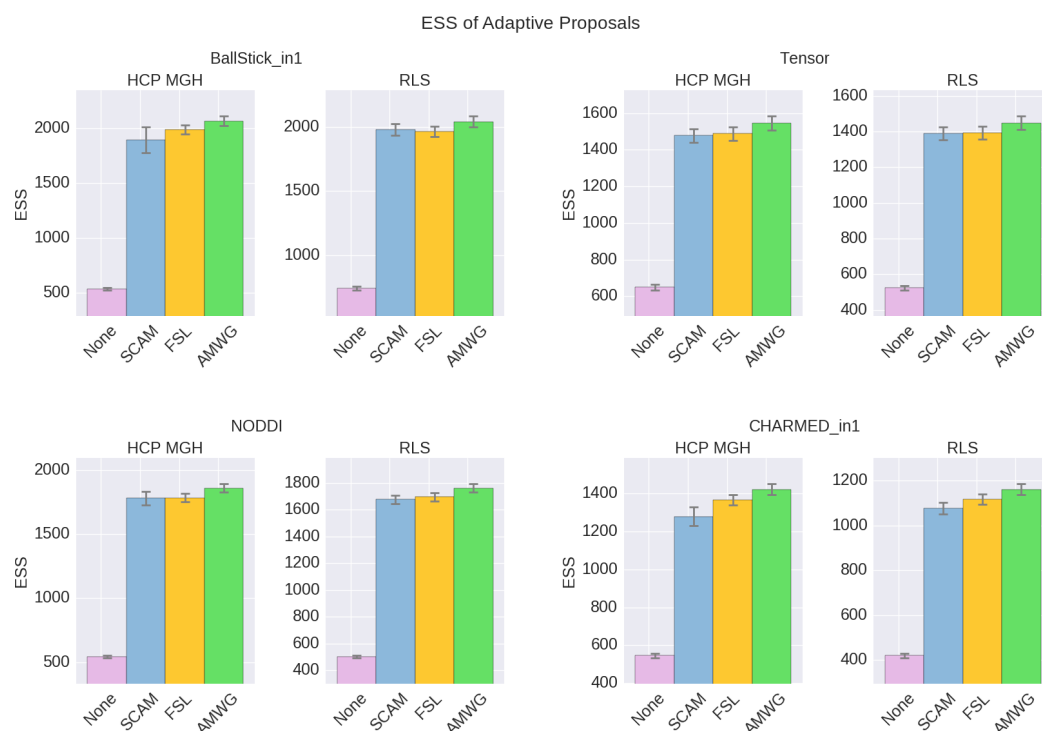

Figure 4: Estimated multivariate Effective Sample Size (ESS), for no adaptive metropolis (None), the Single Component Adaptive Metropolis (SCAM), the FSL acceptance rate scaling (FSL) and Adaptive Metropolis-Within-Gibbs (AMWG) adaptive proposal methods. Whiskers show the standard error of the mean computed over 10 repeats. Results are over 10000 samples, with a burn-in of 1000 samples, without thinning.

starting point, over an increasing length of burn-in. When started from a default starting point, the chains of most voxels will have converged to their stationary distribution after a burn-in of about 3000 samples. When started from an MLE starting point, the chain starts from a point in the stationary distribution and no burn-in is necessary. Starting from an MLE starting point has the additional advantage of removing salt- and pepper-like noise from the mean and std. maps. For example, even after a burn-in of 3000 samples, there are still some voxels in the default starting point maps that have not converged yet. Burn-in also seems to have a greater impact on the standard deviation estimates than it does on the mean estimates. After a burn-in of 1000 samples, the means of the default starting point maps seem to have converged, while the many of the standard deviations clearly have not. In contrast, stable standard deviation estimates are obtained from the MLE initialized chain even without burn-in.

To illustrate this on a single chain basis, in figure 7 we plot the first 1000

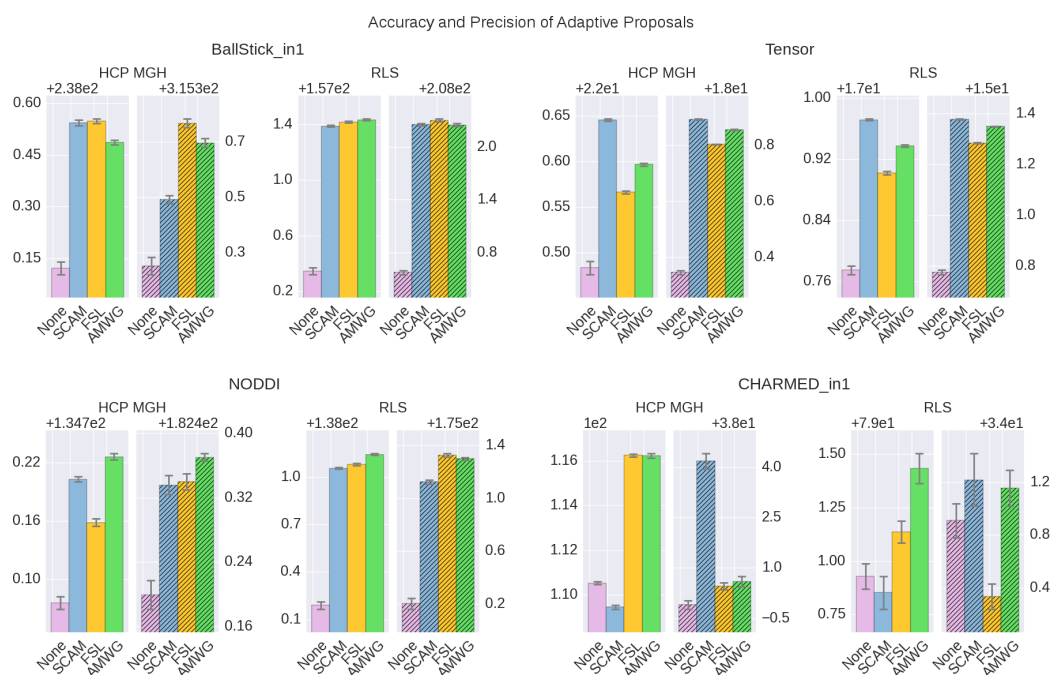

Figure 5: Estimated accuracy (left plots) and precision (right, shaded, plots), for no adaptive metropolis (None), the Single Component Adaptive Metropolis (SCAM), the FSL acceptance rate scaling (FSL) and Adaptive Metropolis-Within-Gibbs (AMWG) adaptive proposal methods. The results are averaged over 10000 voxels and 10 trials, the whiskers show the standard error of the mean computed over the 10 trials. Results are over 10000 samples, with a burn-in of 1000 samples, without thinning.

samples of an MCMC run of the Ball&Stick<sub>in1</sub> and NODDI model using the MLE starting point and two random volume fractions as a starting point, on the left, and (on the right) the effect of discarding the first  $z$  samples when computing the posterior mean and standard deviation (with statistics over 1000 samples, after the burn-in  $z$ ). The sampling trace shows how the sampler moves through the parameter space before converging to the stationary distribution. Interestingly, all points first seem to move toward an intra-axonal volume fraction of zero, before moving up again. This is probably caused by a misalignment of the model orientation with the data's diffusion orientation, making the intra-axonal volume less likely. Only after a correct orientation of the model, the volume fraction can go up again. The plots on the right of the figure show the convergence of the mean and standard deviation with an increased burn-in length. These plots again show that, when started from the MLE, no burn-in is needed, while starting from another position some burn-in is required for the chains to converge.

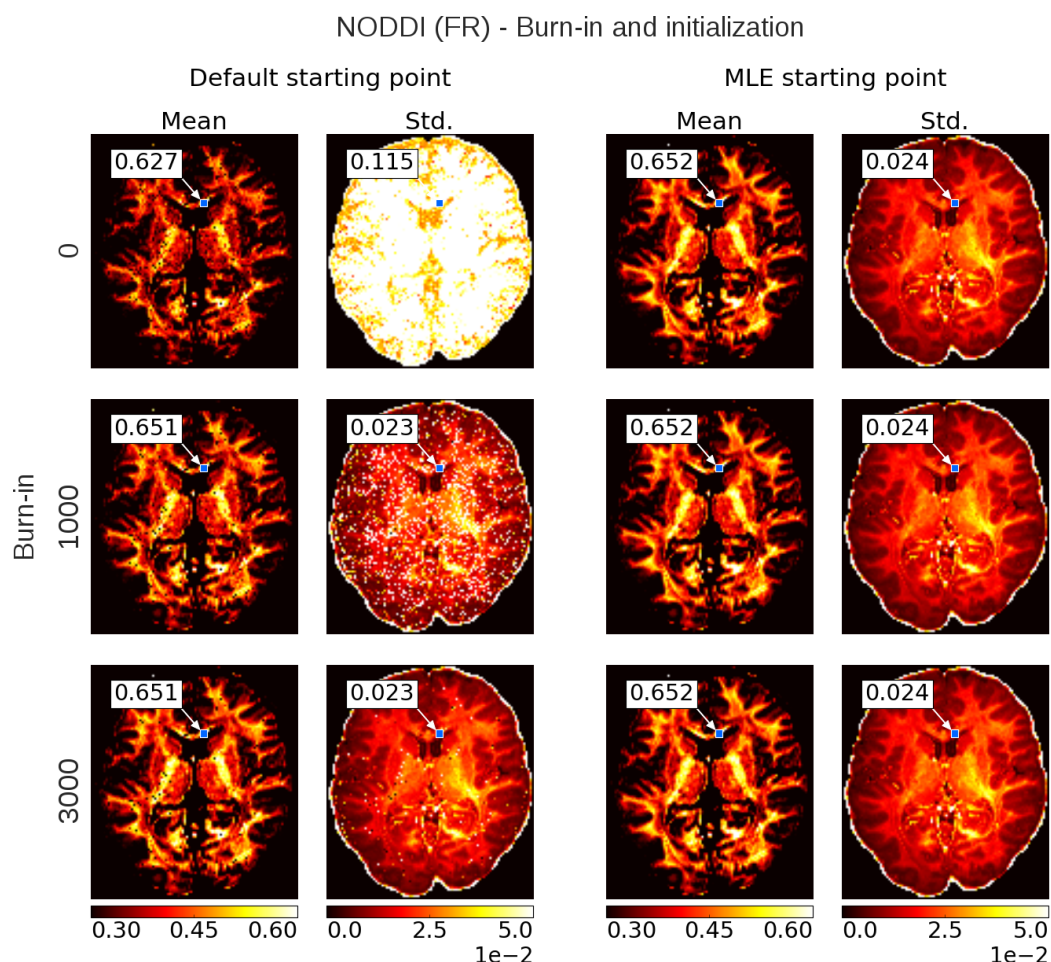

Figure 6: Burnin demonstration and chain initialization using NODDI Fraction of Restricted (FR). On the left, the posterior mean and standard deviation (std.) maps when sampling NODDI from the MDT default starting point, on the right the mean and std. maps when sampling NODDI using a Maximum Likelihood Estimator (MLE) as starting point. The rows show the effect of discarding the first  $z \in \{0, 1000, 3000\}$  samples as burn-in before the mean and std. estimation. Statistics are without thinning and over 10,000 samples after  $z$ . The value insets show the mean and standard deviation value from a Gaussian fit to the sampling chain for the indicated voxel.

### 3.3 Thinning

Thinning of sampler chains has theoretically been shown to reduce the accuracy of posterior analyses (Geyer, 1991; MacEachern & Berliner, 1994; Link & Eaton, 2012), and empirical evidence has been provided for the limited usefulness of thinning Link2012 Here we will show some empirical results of thinning applied to diffusion MRI modeling. Figure 8 shows the effect of thinning on the variability of the returned sampling trace and



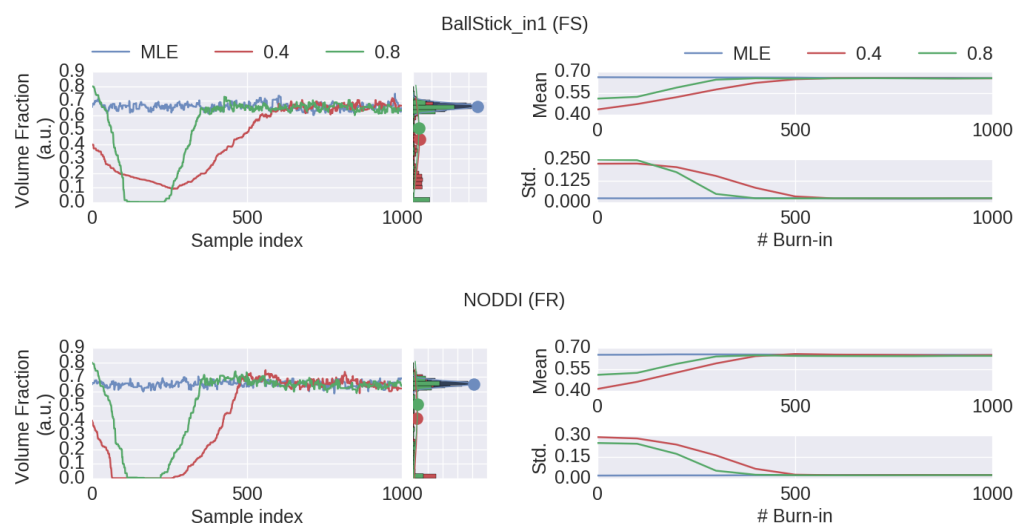

Figure 7: MCMC chains and burn-in results of a single voxel (the voxel indicated in 6). On the left, the sampling trace when starting at the MLE or two default points, with (only) a varying volume fraction. Chain histograms and Gaussian fits as before. On the right, mean and standard deviation computed over 1000 samples with increasing burn-in.

on the estimates of the mean and standard deviation. The sampling trace shows that the chains produce roughly the same distribution, while with increased thinning many more samples are required ( $k$  times more samples, for a thinning of  $k$ ). Comparing the effect of thinning on the mean and standard deviation shows that, as predicted by theory, there is less variance in the estimates when using more samples as compared to thinning the samples. Results also show that 1000 samples without thinning may not be enough for a stable estimates and more samples are required. Yet in accordance with theory, instead of thinning the chain, results indicate that just using more samples (e.g. all  $1000 \cdot k$  samples instead a thinning of  $k$ ) is preferred.

### 3.4 Minimum number of samples

Using multivariate ESS theory we determined, a priori, per model, the number of actual samples needed to generate a sufficient number of effective samples (the effective sample size or ESS) to approximate the underlying posterior density within a 95% confidence region and with a 90% relative precision. Figure 9 shows an estimate on the number of actual samples needed to reach this desired ESS, on average over a white matter mask. In general, the sampling requirements do not depend on the acquisition table, with similar numbers of samples needed for the HCP MGH and RLS



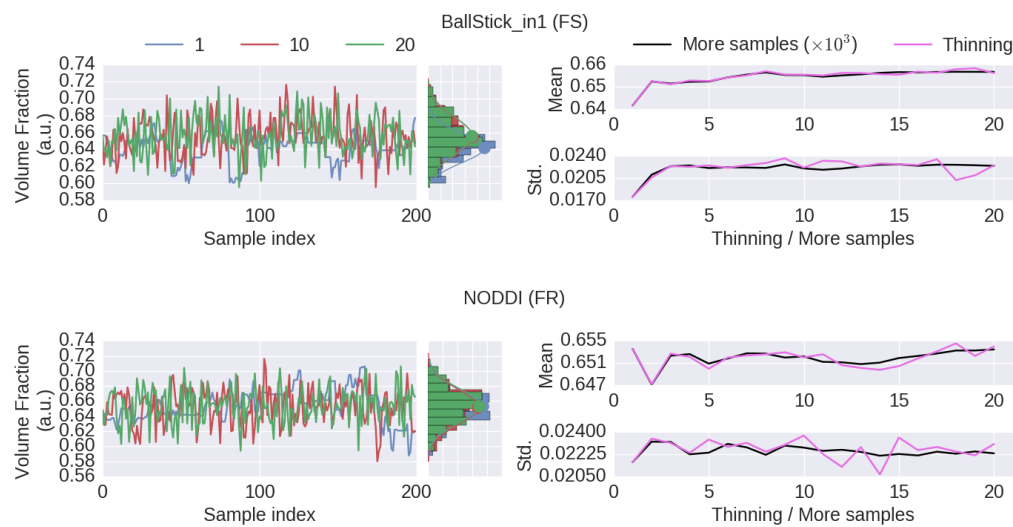

Figure 8: Thinning results of a single voxel (the voxel indicated in 6). On the left, sample traces for the returned samples after a thinning of 1 (no thinning), a thinning of 10 and of 20, with their corresponding histograms. On the right, a comparison of the posterior mean and standard deviation when thinning the chain or when using more samples. When thinning,  $1000 \cdot k$  samples are generated of which only every  $k$ th sample is used (so always 1000 samples are used). When using more samples, all  $1000 \cdot k$  samples are used, without thinning. Results are without burn-in and started from a maximum likelihood estimator.

478 protocols. The exception to the rule is in the CHARMED\_r1 model where  
 479 we need about double the number of samples for the RLS acquisition pro-  
 480 tocol compared to the HCP MGH protocol. This is probably due to the lim-  
 481 ited suitability of the RLS dataset for the CHARMED model as it requires  
 482 high maximum b-values which the RLS protocol does not contain. Table 6  
 483 summarizes the estimated minimum sample requirements, together with  
 484 the required ESS and the number of estimated parameters in each model.  
 485 In general, models with more parameters need more actual samples to  
 486 reach the same confidence and precision, although the Tensor model with  
 487 seven parameters requires less samples than the NODDI model with six  
 488 parameters. This is probably related to the higher complexity (nonlinear  
 489 parameter inter-dependencies) of the NODDI model compared to the Ten-  
 490 sor model. Interestingly, the required ESS to reach the desired confidence  
 491 and precision is very similar, at about 2200, for all models (although the  
 492 numbers of actual samples needed to realize this are different). As an esti-  
 493 mate of computation times, table 7 shows runtime statistics for sampling  
 494 the recommended number of samples for HCP MGH dataset and a RLS  
 495 dataset using a AMD Fury X graphics card. This shows that although 4

to 7 hours are needed to sample more complex CHARMED and NODDI models on the very large HCP MGH dataset (with 552 volumes), gpu accelerated implementation can provide full posterior sampling of diffusion microstructure models over whole brain datasets in reasonable time on a standard graphics card. On the more clinically feasible RLS protocol (134 volumes) whole brain sampling of Tensor and Ball&Stick models can be performed within 20 minutes and NODDI within an hour.

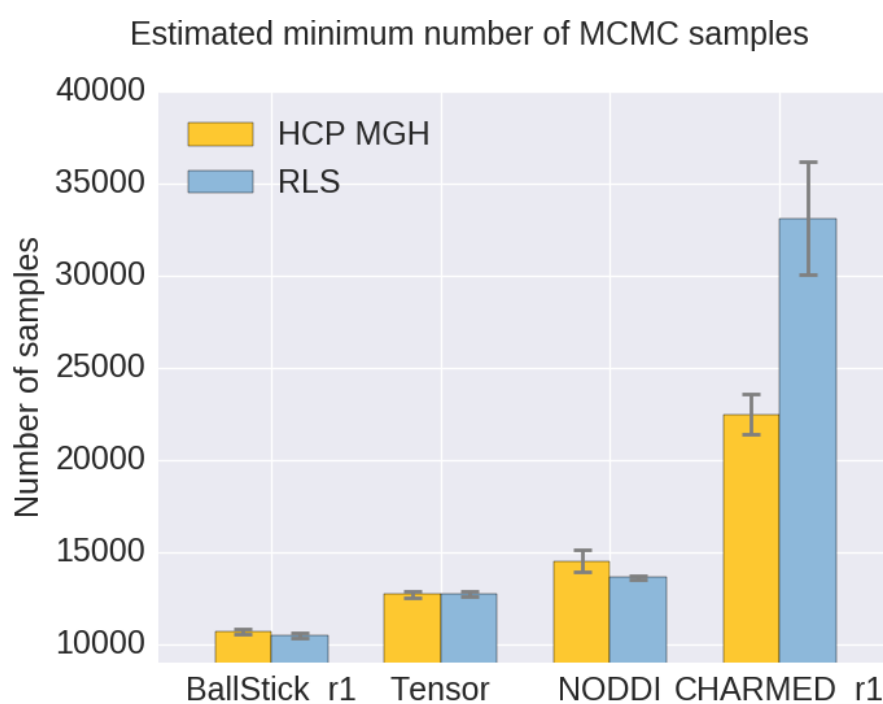

Figure 9: Estimates on the number of samples needed per model, to reach, when averaged over the white matter, a 95% confidence region with a 90% relative precision. Results are shown for both an HCP MGH and RLS acquisition table. Whiskers show the standard error of the mean over 10 subjects.

## 4 Discussion

Using an efficient GPU based implementation, we show that run times can be removed as a prohibitive constraint for sampling of diffusion multi-compartment models, achieving whole brain sampling in under an hour for typical datasets and most common dMRI models. Newer generations of graphics cards are likely to reduce these times even further. Using this implementation, we investigated the use of adaptive MCMC algorithms,

| Model        | Number of parameters | Required ESS | Required nr. of samples |
|--------------|----------------------|--------------|-------------------------|
| BallStick_r1 | 4                    | 2108         | 11000                   |
| NODDI        | 6                    | 2177         | 15000                   |
| Tensor       | 7                    | 2192         | 13000                   |
| CHARMED_r1   | 11                   | 2208         | 24000                   |

Table 6: Estimates on the number of samples needed per model, to reach, when averaged over the white matter, a 95% confidence region with a 90% relative precision. While the required ESS can be determined a priori, the inherent model complexity determines how many samples are needed to reach that ESS.

| Model          | Number of samples | HCP MGH  | RLS      |
|----------------|-------------------|----------|----------|
| Ball&Stick_in1 | 11000             | 00:47:18 | 00:12:56 |
| Tensor         | 13000             | 00:48:53 | 00:19:55 |
| NODDI          | 15000             | 04:20:03 | 00:54:43 |
| CHARMED_in1    | 24000             | 07:15:13 | 01:54:51 |

Table 7: Runtime statistics (hh:mm:ss) for MCMC sampling the estimated minimum number of samples (no burn-in, no-thinning) of various models, using a single HCP MGH (552 volumes) and single RLS (134 volumes) dataset. Runtimes include prior model optimization using the Powell routine. Statistics are over a BET generated whole brain mask which include 410,000 voxels for HCP MGH and 204,993 voxels for RLS. Results are computed using a single AMD Fury X graphics card.

510 burn-in, initialization and thinning. We finally applied the theory of Ef-  
511 fective Sample Size to diffusion multi-compartment models as a way of  
512 determining a sufficient number of samples for a given model and dataset.

#### 513 4.1 Adaptive MCMC

514 The use of adaptive MCMC algorithms increases both the estimated multi-  
515 variate effective sample sizes as well as the accuracy and precision of pos-  
516 terior mean estimates. The Adaptive Metropolis-Within-Gibbs (AMWG)  
517 outperforms other proposal adaptation methods in terms of multivari-  
518 ate Effective Sample Size (ESS). In accuracy and precision the AMWG  
519 method performs higher for the NODDI and CHARMED\_in1 models, but

(slightly) lower for the Ball&Stick.in1 and Tensor models where, respectively, the FSL and the Single Component Adaptive Metropolis (SCAM) methods perform better. Performance of the fixed proposal method could, in theory, be increased to the same levels as the adaptive methods by manual calibration, which could also slightly decrease the chain's autocorrelation compared to adaptive proposals. Since this is model and data (and thus voxel) dependent, manual tuning could be very burdensome and unpractical. This work covers only variations of the single component Random Walk Metropolis, which have the advantage of high efficiency sampling with relatively general model-unspecific proposals. Future work could focus on MCMC algorithms which allow for block-updates of correlated parameters, or could investigate different proposal schemes altogether such as Component-wise Hit-And-Run Metropolis (Turchin, 1971; Smith, 1984), Multiple-Try Metropolis (Liu et al., 2000) and/or No-U-Turn sampler (Hoffman & Gelman, 2011).

## 4.2 *Burn-in*

When starting from an arbitrary position, burn-in is advisable to reduce possible bias due to (possibly) low probability starting positions. Burn-in should ideally be considered post-sampling, since it is difficult to know a priori the time needed for the chain to converge and, due to randomness, past convergence rates provide no guarantee for the future. This is why common practice dictates a relatively large number of burn-in samples which guarantees convergence in most cases.

While not harmful, burn-in is generally unnecessary and inefficient if the starting point is part of the stationary distribution of the Markov chain, which can, for example, be achieved by taking a Maximum Likelihood Estimator (MLE) as starting point. Even when starting from an MLE, a small burn-in of about 100 to 200 samples could be considered to remove correlations with the starting position. Additionally, when using adaptive proposal methods, a small burn-in could be considered to let the adaptation algorithm adapt the proposal distribution before sampling, slightly increasing the effective sample size of the chain.

## 4.3 *Thinning*

Already on theoretical grounds, thinning is not recommended and considered as often unnecessary, always inefficient and reducing the precision of posterior estimates (Link & Eaton, 2012; MacEachern & Berliner, 1994;

Jackman, 2009; Geyer, 1991; Christensen et al., 2010). Illustrations based on the the Ball&Stick\_in1 and NODDI model show that, with or without thinning, the posterior distribution is approximated about equally, while thinning needs  $k$  times more samples (for a thinning of  $k$ ). Results did show a convergence of mean and standard deviation estimates with an increased thinning, but these results are easily duplicated by incorporating not only the thinned samples but also the non-thinned samples in the statistical estimates (the 'more samples' strategy). Furthermore, using more samples instead of thinning provides estimates with a higher precision, as illustrated by the higher variability of the thinned estimates compared to the estimates with more samples (Figure 8, right). One legitimate reason for thinning is that, with independent samples, one can approximate the precision of an MCMC approximation (Link & Eaton, 2012). That is, it allows for more accurate assessment of the standard error of an MCMC estimate like the posterior mean. However, even in that case, thinning must be applied post-hoc, otherwise the precision of the mean itself will be reduced if computed from only the thinned samples. Furthermore, we are often more interested in the variability of the posterior distribution (which can be provided by e.g. the standard deviation) than in the precision of the posterior mean estimate. Another legitimate reason for considering thinning is hardware limitations, such as sampling post-processing time and storage space. However, barring such limitations, avoiding thinning of chains is far more efficient in providing high precision in posterior estimates.

#### 4.4 Number of samples

The issue of the number of samples needed in a chain is often somewhat enigmatic and arbitrary. A common perception is that the number should be 'high', rather too high than too low. Multivariate Effective Sample Size (ESS) theory provides a theoretical lower bound on the number of effective samples needed to approximate the posterior, based on a desired confidence level and precision. How many MCMC samples are required to reach that target effective sample size is then dependent on the data, the model and the MCMC algorithm. We show that the dependency on the data seems to be low for diffusion microstructure models, considering the approximately equal sampling requirements using two different datasets for all but the CHARMED\_in1 model. For that model, the sampling requirements are almost twice as high for the RLS as for the MGH dataset, probably because the RLS acquisition is not suitable for the CHARMED\_in1 model. The dependency on the model is higher, showing that more

595 complex models seem to need more actual samples to reach the target  
596 ESS. Interestingly, we show that for a 95% confidence region ( $\alpha = 0.05$ )  
597 with a 90% precision ( $\epsilon = 0.1$ ) the target ESS is about 2200 for all models.  
598 This sets an informed relatively general target for the amount of samples  
599 required in sampling diffusion microstructural models, which scales the  
600 number of actual samples with the complexity of the model, data and the  
601 performance of the MCMC algorithm. This also means that MCMC al-  
602 gorithms that can generate effective samples more efficiently (such as the  
603 AMWG) can reduce the number of samples needed to reach the same con-  
604 fidence levels, reducing run-time.

## 605 5 Conclusions and recommendations

606 Considering the theoretical soundness and its general robust performance,  
607 we advise the Adaptive Metropolis-Within-Gibbs (AMWG) algorithm for  
608 efficient and robust sampling of diffusion MRI models. We further rec-  
609 ommend initializing the sampler with a maximum likelihood estimator  
610 obtained from, for example, non-linear optimization, in which case 100  
611 to 200 samples are sufficient as a burn-in. Thinning is unnecessary unless  
612 there are memory or hard disk constraints or a strong reliance on posterior  
613 estimates that require uncorrelated samples. As a relatively general tar-  
614 get for the number of samples, we recommend 2200 multivariate effective  
615 samples. The amount of actual MCMC samples required to achieve this  
616 is algorithm and model dependent and can be investigated in a pre-study,  
617 with numbers for common dMRI models reported here as an indication.

## 618 6 Acknowledgements

619 RLH and AR were supported by an ERC Starting Grant (MULTICON-  
620 NECT, #639938), AR was additionally supported by a Dutch science foun-  
621 dation (NWO) VIDI Grant (#14637). Data collection and sharing for this  
622 project was provided, in part, by the MGH-USC Human Connectome Project  
623 (HCP; Principal Investigators: Bruce Rosen, M.D., Ph.D., Arthur W. Toga,  
624 Ph.D., Van J. Weeden, MD). HCP funding was provided by the National  
625 Institute of Dental and Craniofacial Research (NIDCR), the National Insti-  
626 tute of Mental Health (NIMH), and the National Institute of Neurological  
627 Disorders and Stroke (NINDS). HCP data are disseminated by the Labora-  
628 tory of Neuro Imaging at the University of California, Los Angeles. Collec-  
629 tively, the HCP is the result of efforts of co-investigators from the Univer-  
630 sity of California, Los Angeles, Martinos Center for Biomedical Imaging at



631 Massachusetts General Hospital (MGH), Washington University, and the  
632 University of Minnesota. Data collection and sharing for this project was  
633 provided, in part, by the Rhineland Study ([www.rheinland-studie.de](http://www.rheinland-studie.de),  
634 Principal Investigator: Monique M.B. Breteler, M.D., Ph.D.; German  
635 Center for Neurodegenerative Diseases (DZNE), Bonn).

## 636 References

637 Alexander, D. C. (2008). A general framework for experiment design  
638 in diffusion MRI and its application in measuring direct tissue-  
639 microstructure features. *Magnetic resonance in medicine*, 60, 439–48.  
640 URL: <http://www.ncbi.nlm.nih.gov/pubmed/18666109>.  
641 doi:10.1002/mrm.21646.

642 Alexander, D. C. (2009). Modelling, Fitting and Sampling  
643 in Diffusion MRI. In L. D., & W. J. (Eds.), *Visualization  
644 and Processing of Tensor Fields. Mathematics and Visualiza-  
645 tion*. (pp. 3–20). Springer, Berlin, Heidelberg. URL: [http://link.springer.com/10.1007/978-3-540-88378-4\\_{\\_}1](http://link.springer.com/10.1007/978-3-540-88378-4_{_}1).  
646 doi:10.1007/978-3-540-88378-4\_1.

648 Alexander, D. C., Hubbard, P. L., Hall, M. G., Moore, E. A., Ptito, M.,  
649 Parker, G. J. M., & Dyrby, T. B. (2010). Orientationally invariant indices  
650 of axon diameter and density from diffusion MRI. *NeuroImage*, 52, 1374–  
651 1389. URL: <http://dx.doi.org/10.1016/j.neuroimage.2010.05.043>.  
652 doi:10.1016/j.neuroimage.2010.05.043.

653 Assaf, Y., Alexander, D. C., Jones, D. K., Bizzi, A., Behrens, T. E. J., Clark,  
654 C. A., Cohen, Y., Dyrby, T. B., Huppi, P. S., Knoesche, T. R., LeBi-  
655 han, D., Parker, G. J. M., Poupon, C., Anaby, D., Anwender, A., Bar,  
656 L., Barazany, D., Blumenfeld-Katzir, T., De-Santis, S., Duclap, D., Fig-  
657 ini, M., Fisch, E., Guevara, P., Hubbard, P., Hofstetter, S., Jbabdi, S.,  
658 Kunz, N., Lazeyras, F., Lebois, A., Liptrot, M. G., Lundell, H., Man-  
659 gin cedil;ois, J. F., Dominguez, D. M., Morozov, D., Schreiber, J., Se-  
660 unarine, K., Nava, S., Riffert, T., Sasson, E., Schmitt, B., Shemesh, N.,  
661 Sotiropoulos, S. N., Tavor, I., Zhang, H., & Zhou, F. L. (2013). The CON-  
662 NECT project: Combining macro- and micro-structure. *NeuroImage*,  
663 80, 273–282. URL: <http://dx.doi.org/10.1016/j.neuroimage.2013.05.055>.  
664 doi:10.1016/j.neuroimage.2013.05.055.

665 Assaf, Y., & Basser, P. J. (2005). Composite hindered and restricted model



of diffusion (CHARMED) MR imaging of the human brain. *NeuroImage*, 27, 48–58. doi:10.1016/j.neuroimage.2005.03.042.

Assaf, Y., Blumenfeld-Katzir, T., Yovel, Y., & Basser, P. J. (2008). AxCaliber: A method for measuring axon diameter distribution from diffusion MRI. *Magnetic Resonance in Medicine*, 59, 1347–1354. URL: <http://www.ncbi.nlm.nih.gov/pubmed/18506799>. doi:10.1002/mrm.21577. arXiv:15334406.

Assaf, Y., Freidlin, R. Z., Rohde, G. K., & Basser, P. J. (2004). New modeling and experimental framework to characterize hindered and restricted water diffusion in brain white matter. *Magnetic Resonance in Medicine*, 52, 965–978. URL: <http://www.ncbi.nlm.nih.gov/pubmed/15508168>. doi:10.1002/mrm.20274.

Basser, P. J., Mattiello, J., & LeBihan, D. (1994). MR diffusion tensor spectroscopy and imaging. *Biophysical journal*, 66, 259–67. URL: <http://www.pubmedcentral.nih.gov/articlerender.fcgi?artid=1275686&tool=pmcentrez&rendertype=abstract>. doi:10.1016/S0006-3495(94)80775-1.

Behrens, T. E. J., Woolrich, M. W., Jenkinson, M., Johansen-Berg, H., Nunes, R. G., Clare, S., Matthews, P. M., Brady, J. M., & Smith, S. M. (2003). Characterization and Propagation of Uncertainty in Diffusion-Weighted MR Imaging. *Magnetic Resonance in Medicine*, 50, 1077–1088. URL: <http://www.ncbi.nlm.nih.gov/pubmed/14587019>. doi:10.1002/mrm.10609.

Chib, S., & Greenberg, E. (1995). Understanding the Metropolis-Hastings Algorithm. *The American Statistician*, 49, 327–335.

Christensen, R., Johnson, W., Branscum, A., & Hanson, T. E. (2010). *Bayesian Ideas and Data Analysis: An Introduction for Scientists and Statisticians*.

Daducci, A., Canales-Rodríguez, E. J., Zhang, H., Dyrby, T. B., Alexander, D. C., & Thiran, J. P. (2015). Accelerated Microstructure Imaging via Convex Optimization (AMICO) from diffusion MRI data. *NeuroImage*, 105, 32–44. URL: <http://www.ncbi.nlm.nih.gov/pubmed/25462697><http://dx.doi.org/10.1016/j.neuroimage.2014.10.026>. doi:10.1016/j.neuroimage.2014.10.026.

- 701 De Santis, S., Assaf, Y., Evans, C. J., & Jones, D. K. (2014a). Improved  
702 precision in CHARMED assessment of white matter through sampling  
703 scheme optimization and model parsimony testing. *Magnetic Reso-*  
704 *nance in Medicine*, 71, 661–671. URL: [http://www.ncbi.nlm.nih.](http://www.ncbi.nlm.nih.gov/pubmed/23475834)  
705 [gov/pubmed/23475834](http://www.ncbi.nlm.nih.gov/pubmed/23475834). doi:10.1002/mrm.24717.
- 706 De Santis, S., Drakesmith, M., Bells, S., Assaf, Y., & Jones, D. K.  
707 (2014b). Why diffusion tensor MRI does well only some of the  
708 time: Variance and covariance of white matter tissue microstruc-  
709 ture attributes in the living human brain. *NeuroImage*, 89, 35–44.  
710 URL: [http://dx.doi.org/10.1016/j.neuroimage.2013.](http://dx.doi.org/10.1016/j.neuroimage.2013.12.003)  
711 [12.003](http://dx.doi.org/10.1016/j.neuroimage.2013.12.003)<http://www.ncbi.nlm.nih.gov/pubmed/24342225>.  
712 doi:10.1016/j.neuroimage.2013.12.003.
- 713 De Santis, S., Jones, D. K., & Roebroeck, A. (2016). Including diffusion  
714 time dependence in the extra-axonal space improves in vivo estimates  
715 of axonal diameter and density in human white matter. *NeuroImage*,  
716 130, 91–103. URL: [http://dx.doi.org/10.1016/j.neuroimage.](http://dx.doi.org/10.1016/j.neuroimage.2016.01.047)  
717 [2016.01.047](http://dx.doi.org/10.1016/j.neuroimage.2016.01.047). doi:10.1016/j.neuroimage.2016.01.047.
- 718 Dietrich, O., Raya, J. G., Reeder, S. B., Reiser, M. F., & Schoenberg, S. O.  
719 (2007). Measurement of signal-to-noise ratios in MR images: Influ-  
720 ence of multichannel coils, parallel imaging, and reconstruction filters.  
721 *Journal of Magnetic Resonance Imaging*, 26, 375–385. doi:10.1002/jmri.  
722 20969.
- 723 Fieremans, E., Benitez, A., Jensen, J. H., Falangola, M. F., Tabesh, A., Dear-  
724 dorff, R. L., Spampinato, M. V. S., Babb, J. S., Novikov, D. S., Ferris,  
725 S. H., & Helpert, J. A. (2013). Novel white matter tract integrity metrics  
726 sensitive to Alzheimer disease progression. *American Journal of Neurora-*  
727 *diology*, 34, 2105–2112. doi:10.3174/ajnr.A3553.
- 728 Gelman, A., Carlin, J. B., Stern, H. S., Dunson, D. B., Vehtari, A., & Rubin,  
729 D. B. (2013). *Bayesian Data Analysis*. CRC Press.
- 730 Gelman, A., Roberts, G., & Gilks, W. (1996). Efficient Metropolis Jumping  
731 Rules. *Bayesian statistics 5*, (pp. 599–608).
- 732 Geman, S., & Geman, D. (1984). Stochastic Relaxation, Gibbs Distribu-  
733 tions, and the Bayesian Restoration of Images. *IEEE Transactions on Pat-*  
734 *tern Analysis and Machine Intelligence*, PAMI-6, 721–741. doi:10.1109/  
735 TPAMI.1984.4767596.

- 736 Geyer, C. J. (1991). Markov Chain Monte Carlo Maximum Likelihood.  
737 *Computing Science and Statistics: Proceedings of the 23rd Symposium on the*  
738 *Interface*, (pp. 156–163).
- 739 Gong, L., & Flegal, J. M. (2016). A Practical Sequential Stopping  
740 Rule for High-Dimensional Markov Chain Monte Carlo. *Journal*  
741 *of Computational and Graphical Statistics*, 25, 684–700. URL: [http://www.tandfonline.com/doi/full/10.1080/10618600.](http://www.tandfonline.com/doi/full/10.1080/10618600.2015.1044092)  
742 [http://www.tandfonline.com/doi/full/10.1080/10618600.](http://www.tandfonline.com/doi/full/10.1080/10618600.2015.1044092)  
743 2015.1044092. doi:10.1080/10618600.2015.1044092.  
744 arXiv:1403.5536.
- 745 Haario, H., Saksman, E., & Tamminen, J. (2005). Componentwise adapta-  
746 tion for high dimensional MCMC. *Computational Statistics*, 20, 265–273.  
747 doi:10.1007/BF02789703.
- 748 Harms, R. L., Fritz, F. J., Tobisch, A., Goebel, R., & Roebroek, A. (2017).  
749 Robust and fast nonlinear optimization of diffusion MRI microstruc-  
750 ture models. *NeuroImage*, 155, 82–96. URL: [http://dx.doi.org/](http://dx.doi.org/10.1016/j.neuroimage.2017.04.064)  
751 [10.1016/j.neuroimage.2017.04.064](http://dx.doi.org/10.1016/j.neuroimage.2017.04.064)[http://linkinghub.](http://linkinghub.elsevier.com/retrieve/pii/S1053811917303178)  
752 [elsevier.com/retrieve/pii/S1053811917303178.](http://linkinghub.elsevier.com/retrieve/pii/S1053811917303178)  
753 doi:10.1016/j.neuroimage.2017.04.064.
- 754 Hastings, W. K. (1970). Monte Carlo Sampling Methods Using Markov  
755 Chains and Their Applications. *Biometrika*, 57, 97. URL: [http://www.](http://www.jstor.org/stable/2334940?origin=crossref)  
756 [jstor.org/stable/2334940?origin=crossref.](http://www.jstor.org/stable/2334940?origin=crossref) doi:10.2307/  
757 2334940.
- 758 Hoffman, M. D., & Gelman, A. (2011). The No-U-Turn Sampler: Adap-  
759 tively Setting Path Lengths in Hamiltonian Monte Carlo. *Journal of*  
760 *Machine Learning Research*, 15, 1593–1623. URL: [http://arxiv.org/](http://arxiv.org/abs/1111.4246)  
761 [abs/1111.4246.](http://arxiv.org/abs/1111.4246) arXiv:1111.4246.
- 762 Jackman, S. (2009). *Bayesian Analysis for the Social Sciences*. Chichester, UK:  
763 John Wiley & Sons, Ltd. URL: [http://doi.wiley.com/10.1002/](http://doi.wiley.com/10.1002/9780470686621)  
764 [9780470686621.](http://doi.wiley.com/10.1002/9780470686621) doi:10.1002/9780470686621.
- 765 Jelescu, I. O., Veraart, J., Adisetiyo, V., Milla, S. S., Novikov, D. S., &  
766 Fieremans, E. (2015a). One diffusion acquisition and different white  
767 matter models: How does microstructure change in human early  
768 development based on WMTI and NODDI? *NeuroImage*, 107, 242–  
769 256. URL: [http://dx.doi.org/10.1016/j.neuroimage.2014.](http://dx.doi.org/10.1016/j.neuroimage.2014.12.009)  
770 [12.009](http://dx.doi.org/10.1016/j.neuroimage.2014.12.009)[http://www.ncbi.nlm.nih.gov/pubmed/25498427.](http://www.ncbi.nlm.nih.gov/pubmed/25498427)  
771 doi:10.1016/j.neuroimage.2014.12.009.

- 772 Jelescu, I. O., Veraart, J., Fieremans, E., & Novikov, D. S. (2015b). Caveats  
773 of non-linear fitting to brain tissue models of diffusion. In *ISMRM 2015*  
774 (p. 88040). volume 23.
- 775 Jelescu, I. O., Veraart, J., Fieremans, E., & Novikov, D. S. (2016). Degener-  
776 acy in model parameter estimation for multi-compartmental diffusion  
777 in neuronal tissue. *NMR in Biomedicine*, 29, 33–47. URL: <http://www.ncbi.nlm.nih.gov/pubmed/26615981>. doi:10.1002/nbm.3450.
- 779 Johnson, A. A., Jones, G. L., & Neath, R. C. (2013). Component-Wise  
780 Markov Chain Monte Carlo: Uniform and Geometric Ergodicity under  
781 Mixing and Composition. *Statistical Science*, 28, 360–375. URL:  
782 <http://projecteuclid.org/euclid.ss/1377696941>. doi:10.  
783 1214/13-STS423.arXiv:arXiv:0903.0664v6.
- 784 Kass, R. E., Carlin, B. P., Gelman, A., & Neal, R. M. (1998). Markov Chain  
785 Monte Carlo in Practice: A Roundtable Discussion. *The American Statis-  
786 tician*, 52, 93. URL: [http://www.jstor.org/stable/2685466?](http://www.jstor.org/stable/2685466?origin=crossref)  
787 [origin=crossref](http://www.jstor.org/stable/2685466?origin=crossref). doi:10.2307/2685466.
- 788 Le Bihan, D., Breton, E., Lallemand, D., Grenier, P., Cabanis,  
789 E., & Laval-Jeantet, M. (1986). MR imaging of intravoxel in-  
790 coherent motions: application to diffusion and perfusion in  
791 neurologic disorders. *Radiology*, 161, 401–407. URL: <http://pubs.rsna.org/doi/10.1148/radiology.161.2.3763909>.  
792 doi:10.1148/radiology.161.2.3763909.
- 794 Link, W. A., & Eaton, M. J. (2012). On thinning of chains in MCMC. *Meth-  
795 ods in Ecology and Evolution*, 3, 112–115. doi:10.1111/j.2041-210X.  
796 2011.00131.x.
- 797 Liu, J. S. (2004). *Monte Carlo Strategies in Scientific Computing*. Springer  
798 Series in Statistics. New York, NY: Springer New York. URL: <http://link.springer.com/10.1007/978-0-387-76371-2>. doi:10.  
799 1007/978-0-387-76371-2.  
800
- 801 Liu, J. S., Liang, F., & Wong, W. H. (2000). The Multiple-Try Method and  
802 Local Optimization in Metropolis Sampling. *Journal of the American Sta-  
803 tistical Association*, 95, 121. URL: [http://www.jstor.org/stable/](http://www.jstor.org/stable/2669532?origin=crossref)  
804 [2669532?origin=crossref](http://www.jstor.org/stable/2669532?origin=crossref). doi:10.2307/2669532.
- 805 MacEachern, S. N., & Berliner, L. M. (1994). Subsampling the Gibbs  
806 Sampler. *The American Statistician*, 48, 188. URL: <http://www>.

- 807 [jstor.org/stable/2684714?origin=crossref](http://jstor.org/stable/2684714?origin=crossref). doi:10.2307/  
808 2684714.
- 809 Martino, L., Elvira, V., & Louzada, F. (2017). Effective sample size  
810 for importance sampling based on discrepancy measures. *Signal Processing*, 131, 386–401. doi:10.1016/j.sigpro.2016.08.025.  
811 *arXiv:1602.03572*.
- 813 Metropolis, N., Rosenbluth, A. W., Rosenbluth, M. N., Teller,  
814 A. H., & Teller, E. (1953). Equation of State Calculations by  
815 Fast Computing Machines. *The Journal of Chemical Physics*, 21,  
816 1087–1092. URL: [http://aip.scitation.org/doi/10.1063/1.](http://aip.scitation.org/doi/10.1063/1.1699114)  
817 1699114. doi:10.1063/1.1699114. *arXiv:5744249209*.
- 818 Moeller, S., Yacoub, E., Olman, C. A., Auerbach, E., Strupp, J., Harel, N.,  
819 & Ugurbil, K. (2010). Multiband multislice GE-EPI at 7 tesla, with 16-  
820 fold acceleration using partial parallel imaging with application to high  
821 spatial and temporal whole-brain fMRI. *Magnetic Resonance in Medicine*,  
822 63, 1144–1153. doi:10.1002/mrm.22361.
- 823 Muller, P. (1994). Metropolis based posterior integration schemes. *Numerical Recipes in Fortran (2nd Edition)*, . URL: [http://citeseerx.ist.](http://citeseerx.ist.psu.edu/viewdoc/summary?doi=10.1.1.55.3539)  
824 [psu.edu/viewdoc/summary?doi=10.1.1.55.3539](http://citeseerx.ist.psu.edu/viewdoc/summary?doi=10.1.1.55.3539).
- 826 Panagiotaki, E., Schneider, T., Siow, B., Hall, M. G., Lyth-  
827 goe, M. F., & Alexander, D. C. (2012). Compartment mod-  
828 els of the diffusion MR signal in brain white matter: A tax-  
829 onomy and comparison. *NeuroImage*, 59, 2241–2254. URL:  
830 [http://dx.doi.org/10.1016/j.neuroimage.2011.09.](http://dx.doi.org/10.1016/j.neuroimage.2011.09.081)  
831 081<http://www.ncbi.nlm.nih.gov/pubmed/22001791>.  
832 doi:10.1016/j.neuroimage.2011.09.081.
- 833 van Ravenzwaaij, D., Cassey, P., & Brown, S. D. (2016). A simple in-  
834 troduction to Markov Chain Monte-Carlo sampling. *Psychonomic Bul-*  
835 *letin and Review*, (pp. 1–12). URL: [http://dx.doi.org/10.3758/](http://dx.doi.org/10.3758/s13423-016-1015-8)  
836 s13423-016-1015-8. doi:10.3758/s13423-016-1015-8.
- 837 Robert, C. P. (2015). *The Metropolis-Hastings algorithm*. Technical  
838 Report Wiley StatsRef: Statistics Reference Online. URL: [http:](http://arxiv.org/abs/1504.01896)  
839 [//arxiv.org/abs/1504.01896](http://arxiv.org/abs/1504.01896). doi:10.1002/9781118445112.  
840 stat07834. *arXiv:1504.01896*.
- 841 Robert, C. P., & Casella, G. (2004). *Monte Carlo Statistical Methods*. Springer  
842 Texts in Statistics. New York, NY: Springer New York. URL: [http:](http://)

- 843 //link.springer.com/10.1007/978-1-4757-4145-2. doi:10.  
844 1007/978-1-4757-4145-2.
- 845 Roberts, G. O., & Rosenthal, J. S. (2007). Coupling and ergodicity of adap-  
846 tive Markov chain Monte Carlo algorithms. *Journal of Applied Probabil-*  
847 *ity*, 44, 458–475. URL: [http://projecteuclid.org/euclid.jap/](http://projecteuclid.org/euclid.jap/1183667414)  
848 [1183667414](http://projecteuclid.org/euclid.jap/1183667414). doi:10.1239/jap/1183667414.
- 849 Roberts, G. O., & Rosenthal, J. S. (2009). Examples of adaptive MCMC.  
850 *Journal of Computational and Graphical Statistics*, 18, 349–367. URL: [http:](http://probability.ca/jeff/ftpdir/adaptex.pdf)  
851 [//probability.ca/jeff/ftpdir/adaptex.pdf](http://probability.ca/jeff/ftpdir/adaptex.pdf). doi:10.1198/  
852 [jcg.2009.06134](http://probability.ca/jeff/ftpdir/adaptex.pdf).
- 853 Santis, S. D., Assaf, Y., Jeurissen, B., Jones, D. K., & Roebroek,  
854 A. (2016). T1 relaxometry of crossing fibres in the human  
855 brain. *NeuroImage*, 141, 133–142. URL: [http://linkinghub.](http://linkinghub.elsevier.com/retrieve/pii/S1053811916303445)  
856 [elsevier.com/retrieve/pii/S1053811916303445](http://linkinghub.elsevier.com/retrieve/pii/S1053811916303445).  
857 doi:10.1016/j.neuroimage.2016.07.037.
- 858 Sherlock, C., Fearnhead, P., & Roberts, G. O. (2010). The Ran-  
859 dom Walk Metropolis: Linking Theory and Practice Through  
860 a Case Study. *Statistical Science*, 25, 172–190. URL: [http:](http://projecteuclid.org/euclid.ss/1290175840)  
861 [//projecteuclid.org/euclid.ss/1290175840](http://projecteuclid.org/euclid.ss/1290175840). doi:10.1214/  
862 [10-STS327](http://projecteuclid.org/euclid.ss/1290175840). arXiv:arXiv:1011.6217v1.
- 863 Smith, R. L. (1984). Efficient Monte Carlo Procedures for Generat-  
864 ing Points Uniformly Distributed over Bounded Regions. *Operations*  
865 *Research*, 32, 1296–1308. URL: [http://pubsonline.informs.org/](http://pubsonline.informs.org/doi/abs/10.1287/opre.32.6.1296)  
866 [doi/abs/10.1287/opre.32.6.1296](http://pubsonline.informs.org/doi/abs/10.1287/opre.32.6.1296). doi:10.1287/opre.32.6.  
867 1296.
- 868 Smith, S. M. (2002). Fast robust automated brain extraction. *Human*  
869 *Brain Mapping*, 17, 143–155. URL: [http://www.ncbi.nlm.nih.gov/](http://www.ncbi.nlm.nih.gov/pubmed/12391568)  
870 [pubmed/12391568](http://www.ncbi.nlm.nih.gov/pubmed/12391568). doi:10.1002/hbm.10062.
- 871 Sotiropoulos, S. N., Behrens, T. E. J., & Jbabdi, S. (2012). Ball and  
872 rackets: Inferring fiber fanning from diffusion-weighted MRI. *Neu-*  
873 *roImage*, 60, 1412–1425. URL: [http://www.ncbi.nlm.nih.gov/](http://www.ncbi.nlm.nih.gov/pubmed/22270351)  
874 [pubmed/22270351](http://www.ncbi.nlm.nih.gov/pubmed/22270351). doi:10.1016/j.neuroimage.2012.01.056.
- 875 Sotiropoulos, S. N., Jbabdi, S., Andersson, J. L., Woolrich, M. W., Ugurbil,  
876 K., & Behrens, T. E. J. (2013). RubiX: Combining spatial resolutions for  
877 bayesian inference of crossing fibers in diffusion MRI. *IEEE Transactions*



878 on *Medical Imaging*, 32, 969–982. URL: <http://www.ncbi.nlm.nih.gov/pubmed/23362247>. doi:10.1109/TMI.2012.2231873.

879

880 Tariq, M., Schneider, T., Alexander, D. C., Gandini Wheeler-Kingshott,  
881 C. A., & Zhang, H. (2016). Bingham-NODDI: Mapping anisotropic  
882 orientation dispersion of neurites using diffusion MRI. *NeuroImage*,  
883 133, 207–223. URL: [https://www.ncbi.nlm.nih.gov/pubmed/](https://www.ncbi.nlm.nih.gov/pubmed/26826512)  
884 26826512. doi:10.1016/j.neuroimage.2016.01.046.

885 Turchin, V. F. (1971). On the Computation of Multidimensional Integrals  
886 by the Monte-Carlo Method. *Theory of Probability & Its Applications*, 16,  
887 720–724. URL: <http://epubs.siam.org/doi/10.1137/1116083>.  
888 doi:10.1137/1116083.

889 Vats, D., Flegal, J. M., & Jones, G. L. (2015). Multivariate Output Analysis  
890 for Markov chain Monte Carlo. *ArXiv e-prints*, (pp. 1–52). URL: [http://](http://arxiv.org/abs/1512.07713)  
891 [arxiv.org/abs/1512.07713](http://arxiv.org/abs/1512.07713). arXiv:1512.07713.

892 Xu, J., Moeller, S., Auerbach, E. J., Strupp, J., Smith, S. M., Feinberg, D. A.,  
893 Yacoub, E., & Uğurbil, K. (2013). Evaluation of slice accelerations using  
894 multiband echo planar imaging at 3T. *NeuroImage*, 83, 991–1001. doi:10.  
895 1016/j.neuroimage.2013.07.055. arXiv:NIHMS150003.

896 Zhang, H., Hubbard, P. L., Parker, G. J. M., & Alexander, D. C.  
897 (2011). Axon diameter mapping in the presence of orienta-  
898 tion dispersion with diffusion MRI. *NeuroImage*, 56, 1301–1315.  
899 URL: [http://dx.doi.org/10.1016/j.neuroimage.2011.](http://dx.doi.org/10.1016/j.neuroimage.2011.01.084)  
900 01.084<http://www.ncbi.nlm.nih.gov/pubmed/21316474>.  
901 doi:10.1016/j.neuroimage.2011.01.084.

902 Zhang, H., Schneider, T., Wheeler-Kingshott, C. A., & Alexander, D. C.  
903 (2012). NODDI: Practical in vivo neurite orientation dispersion  
904 and density imaging of the human brain. *NeuroImage*, 61, 1000–  
905 1016. URL: [http://dx.doi.org/10.1016/j.neuroimage.](http://dx.doi.org/10.1016/j.neuroimage.2012.03.072)  
906 2012.03.072[http://www.ncbi.nlm.nih.gov/pubmed/](http://www.ncbi.nlm.nih.gov/pubmed/22484410)  
907 22484410[http://ac.els-cdn.com/S1053811912003539/](http://ac.els-cdn.com/S1053811912003539/1-s2.0-S1053811912003539-main.pdf?{}_tid=55731f80-bac3-11e5-b1b1-00000aab0f26{&}acdnat=1452778562{__}8419fbce016e7afd001b1a2d30)  
908 1-s2.0-S1053811912003539-main.pdf?{}\_tid=  
909 55731f80-bac3-11e5-b1b1-00000aab0f26{&}acdnat=  
910 1452778562{\_\_}8419fbce016e7afd001b1a2d30. doi:10.1016/  
911 j.neuroimage.2012.03.072.
